# Supplementary material for: Aerobic oxidation of indole carbinols using Fe(NO3)3·9H2O/TEMPO/NaCl as catalysts
Source: Royal Society of Chemistry journal article supplement (doi:10.1039/c3ob40226f), 2013-01-01

**Aerobic oxidation of indole-carbinols using  $\text{Fe}(\text{NO}_3)_3 \cdot 9\text{H}_2\text{O}$ /TEMPO/NaCl as catalysts**

Jinxian Liu<sup>a</sup>, Shengming Ma<sup>a,b</sup>\*

<sup>a</sup> *Shanghai Key Laboratory of Green Chemistry and Chemical Process, Department of Chemistry, East China Normal University, 3663 North Zhongshan Lu, Shanghai 200062, P. R. China*

<sup>b</sup> *State Key Laboratory of Organometallic Chemistry, Shanghai Institute of Organic Chemistry, Chinese Academy of Sciences, 354 Fenglin Lu, Shanghai 200032, P. R. China*

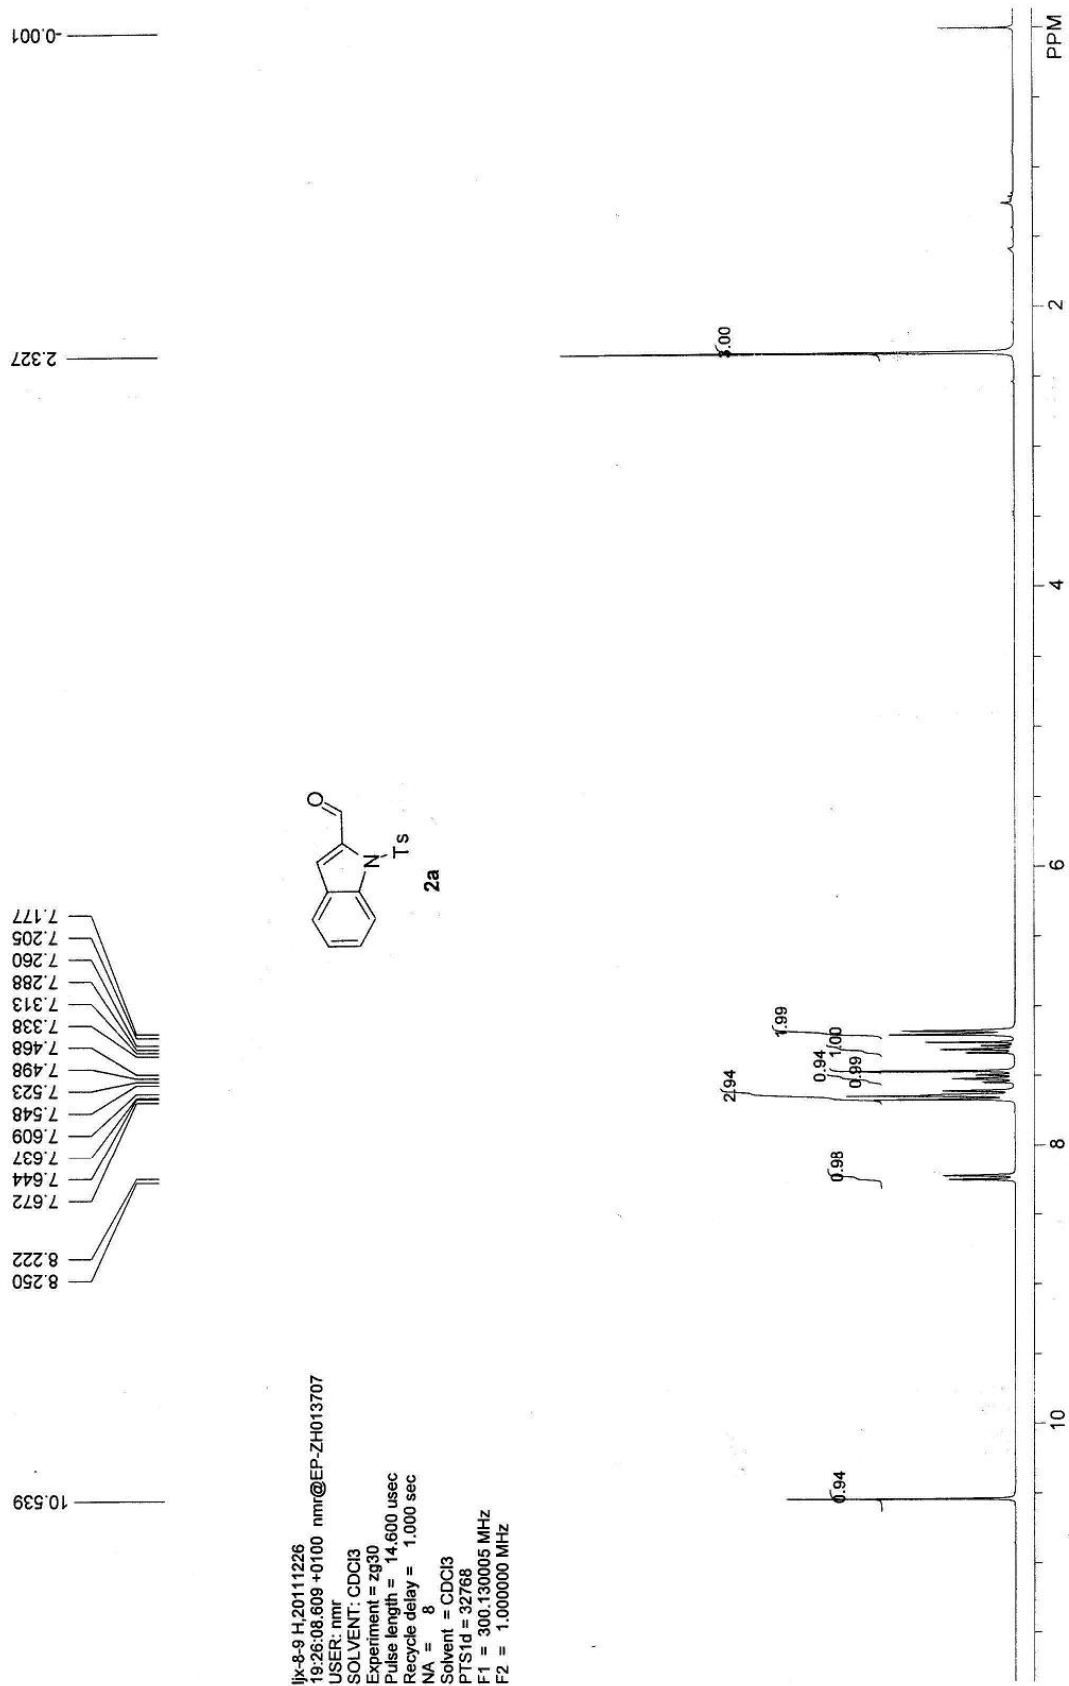

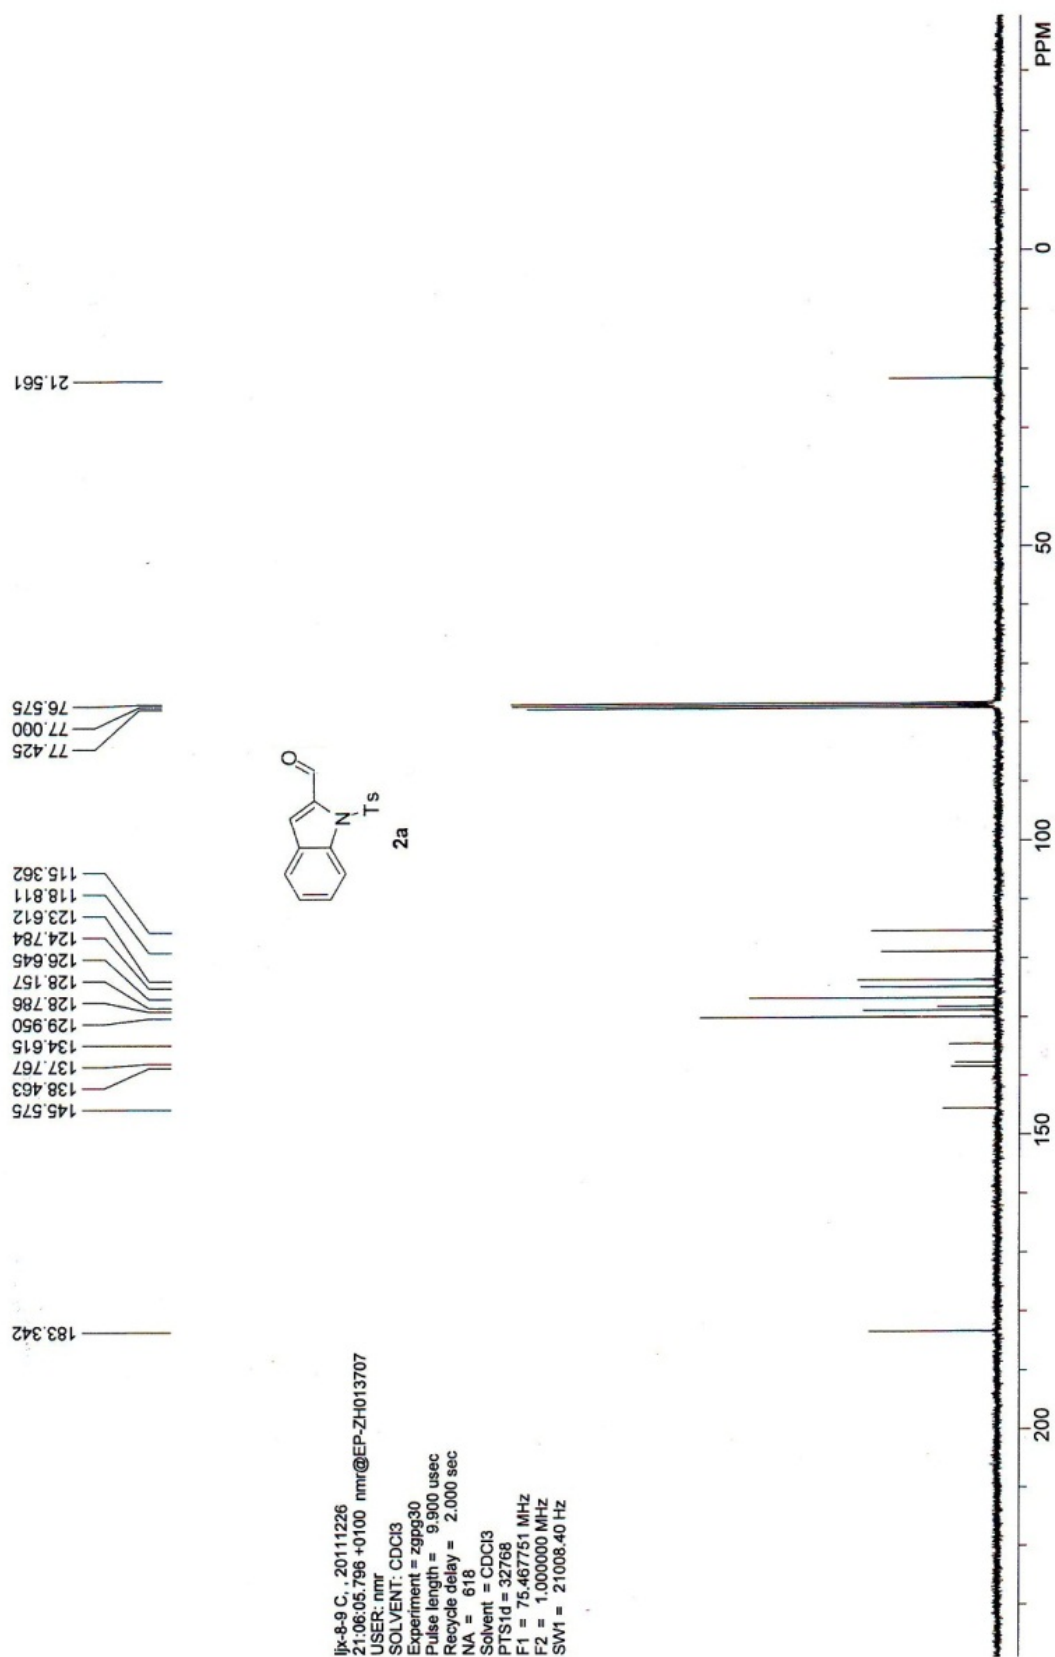

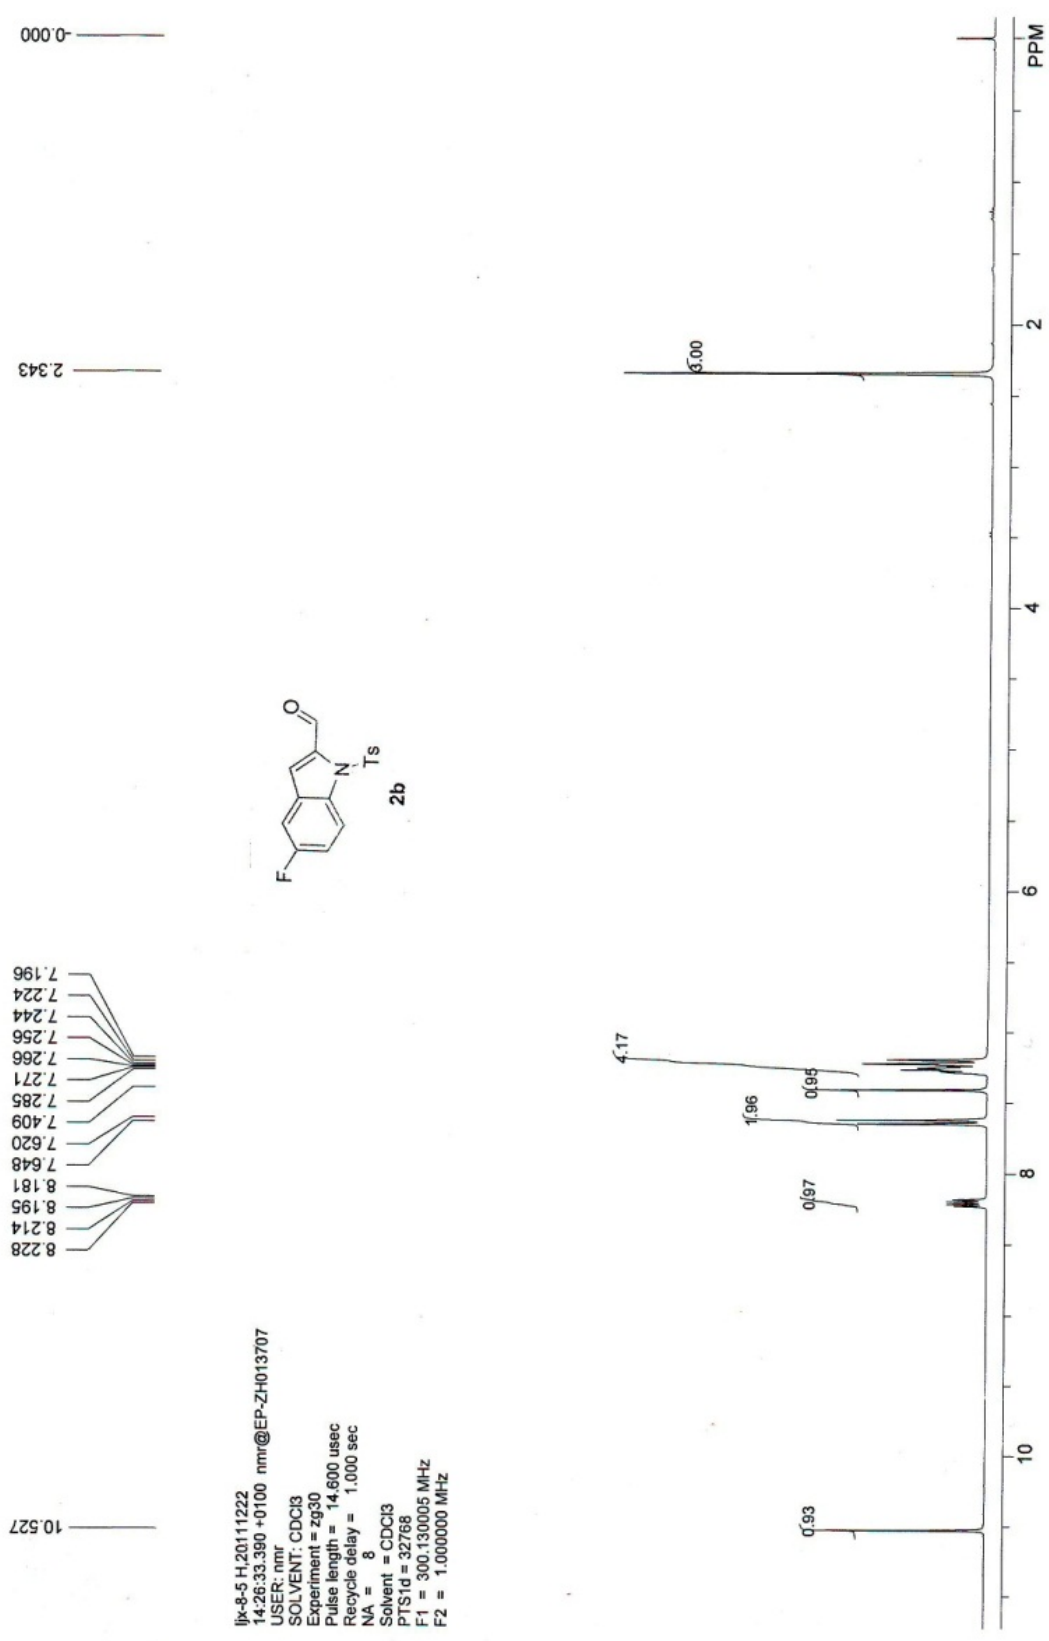

ljx-8-5 H, 20111222  
14:26:33.390 +0100 nmr@EP-ZH013707  
USER: nmr  
SOLVENT: CDCl<sub>3</sub>  
Experiment = zg30  
Pulse length = 14.600 usec  
Recycle delay = 1.000 sec  
NA = 8  
Solvent = CDCl<sub>3</sub>  
PTSD = 32768  
F1 = 300.130005 MHz  
F2 = 1.0000000 MHz

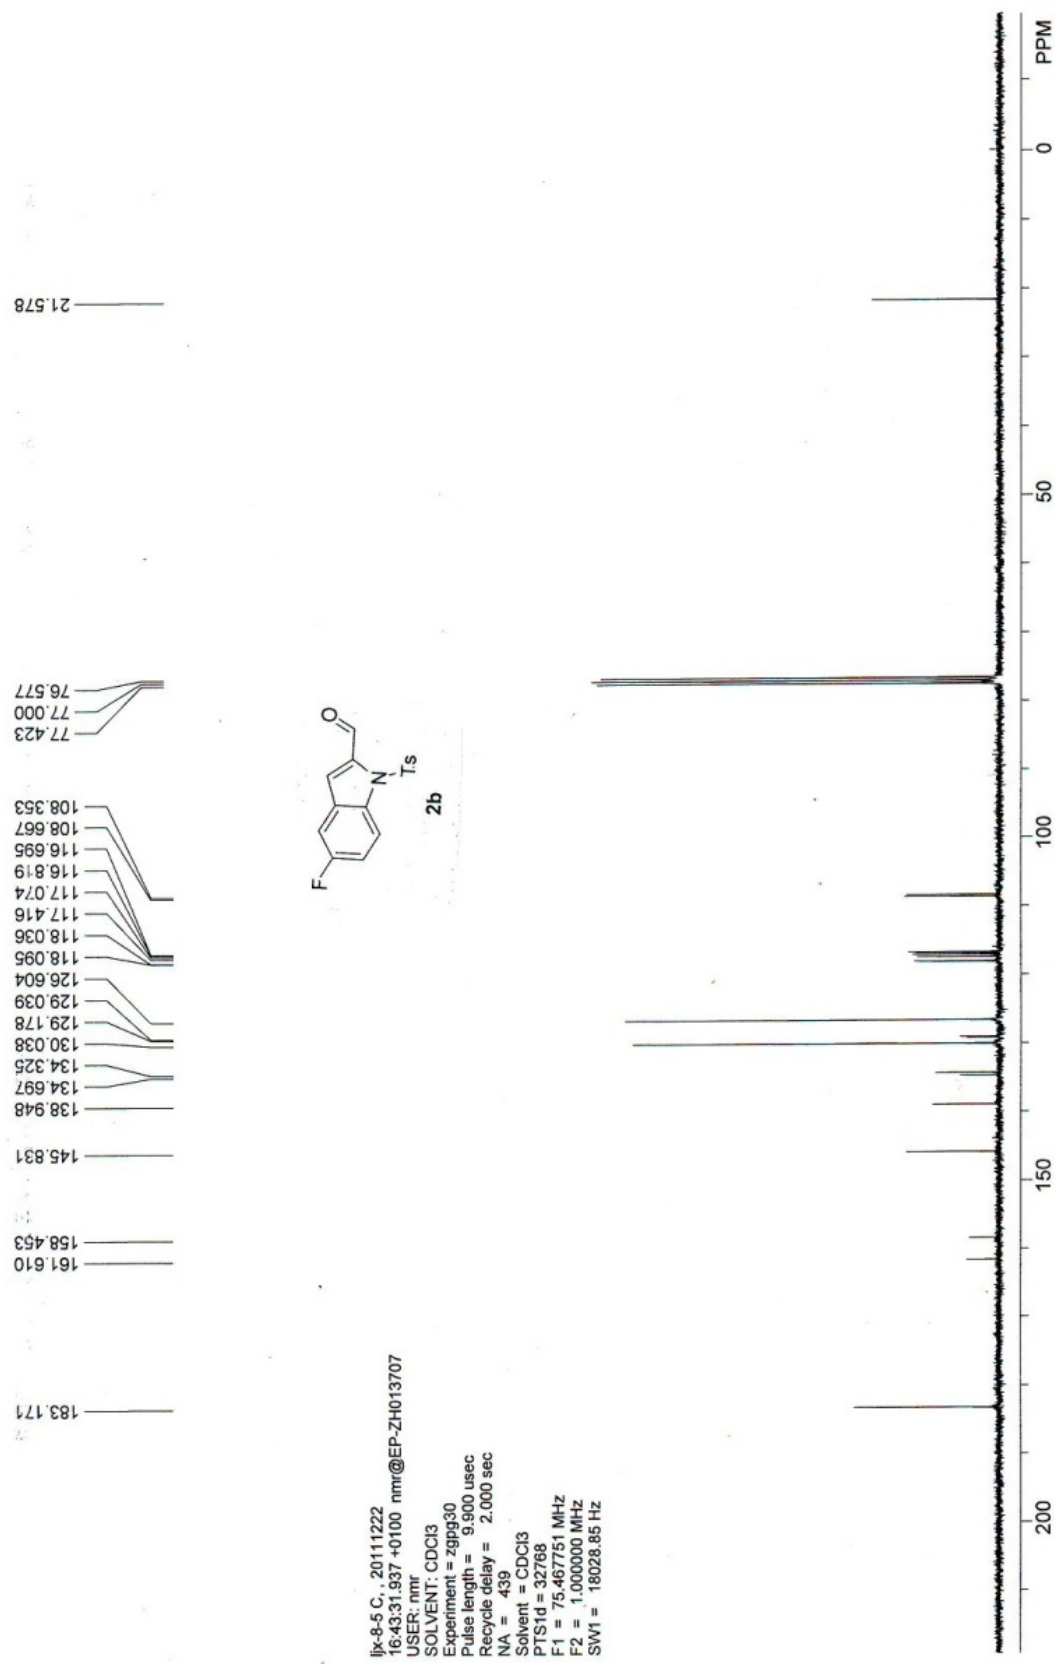

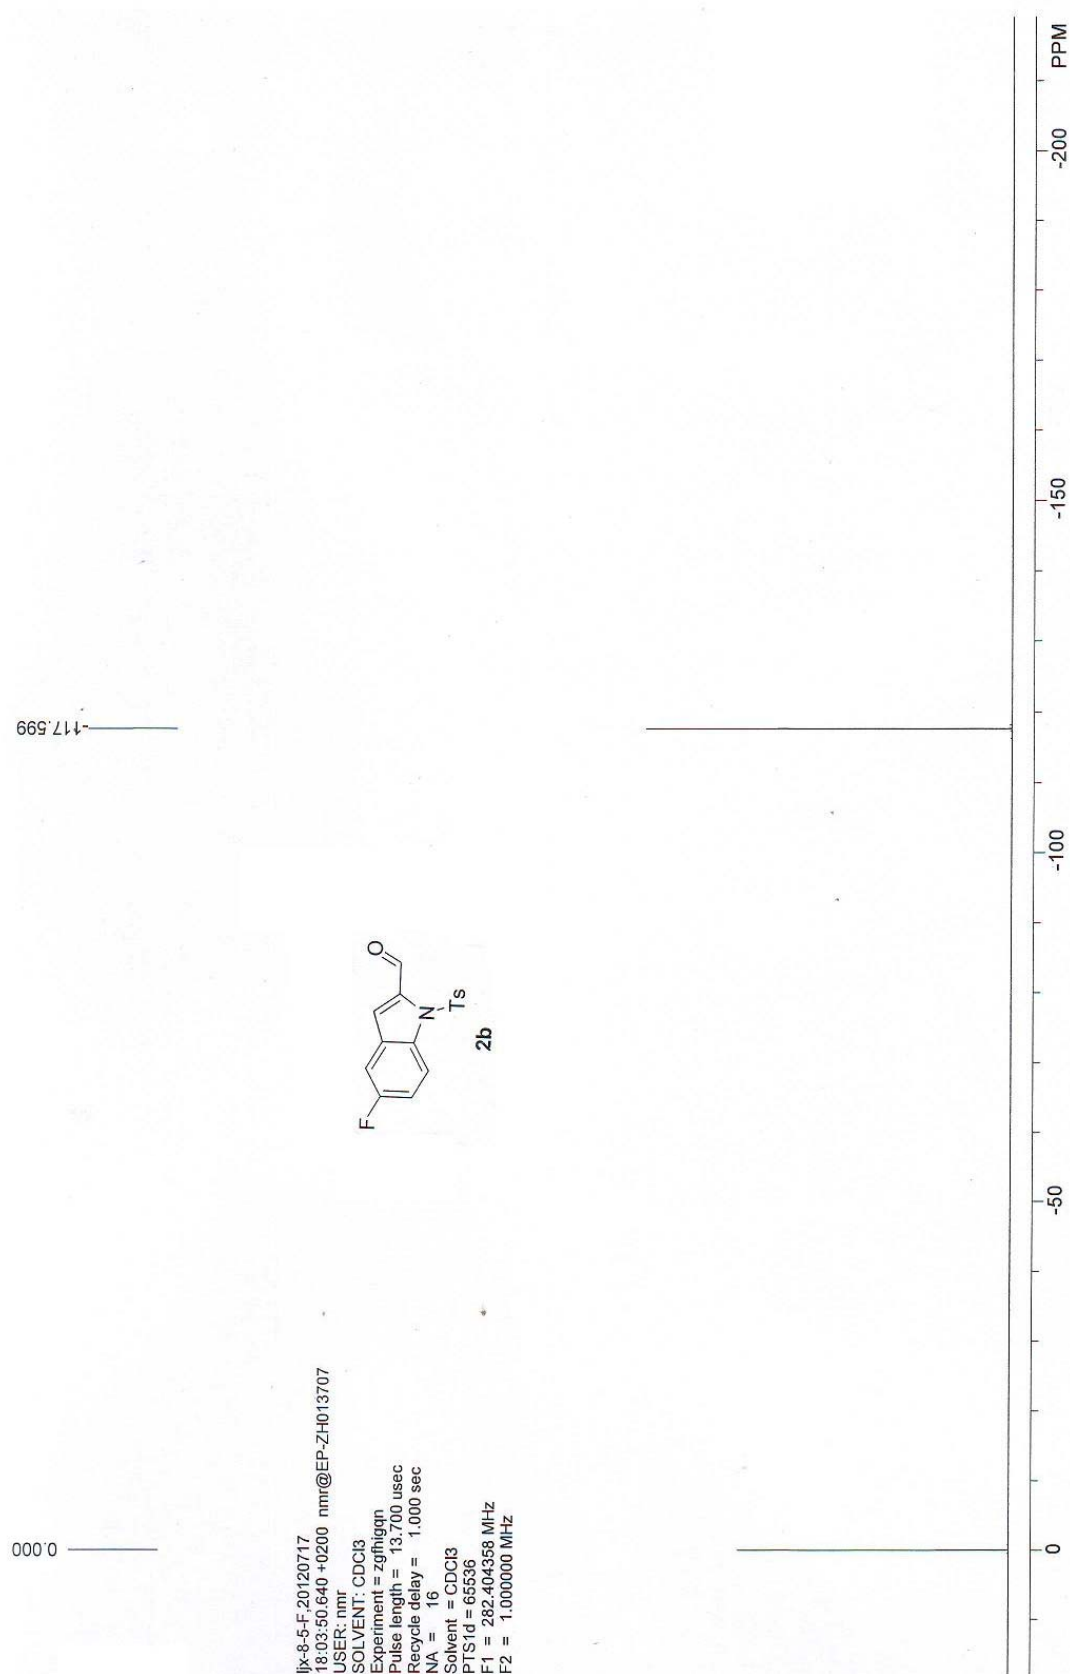

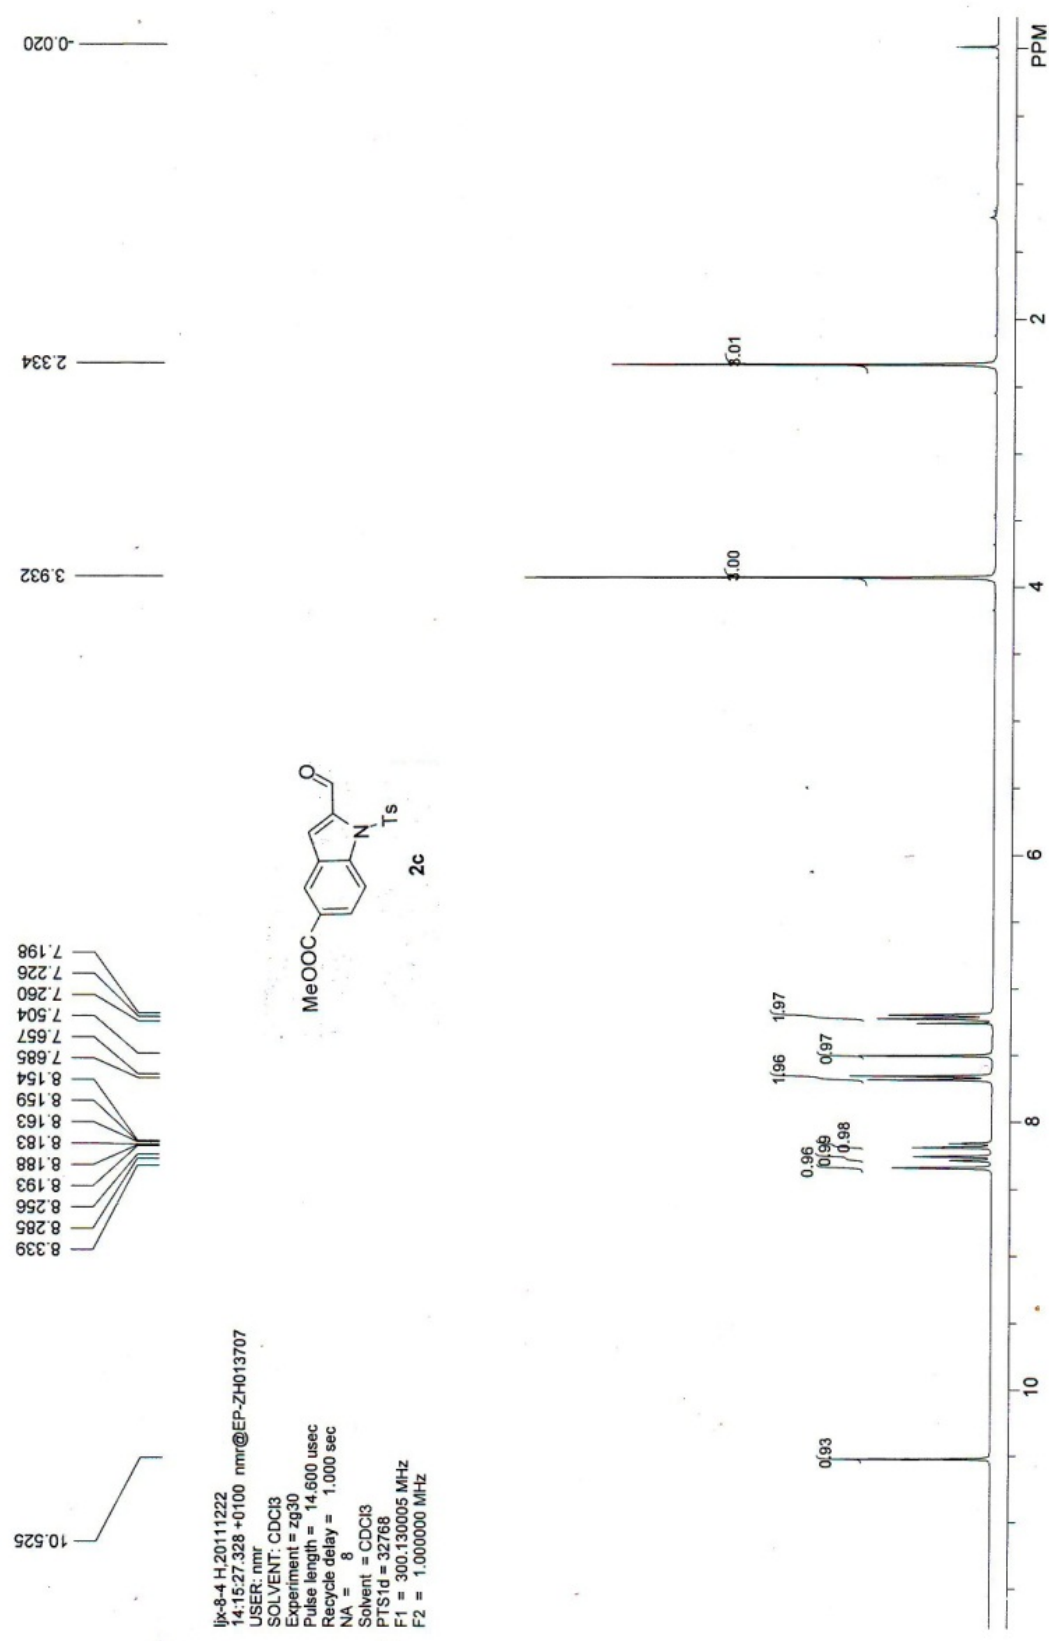

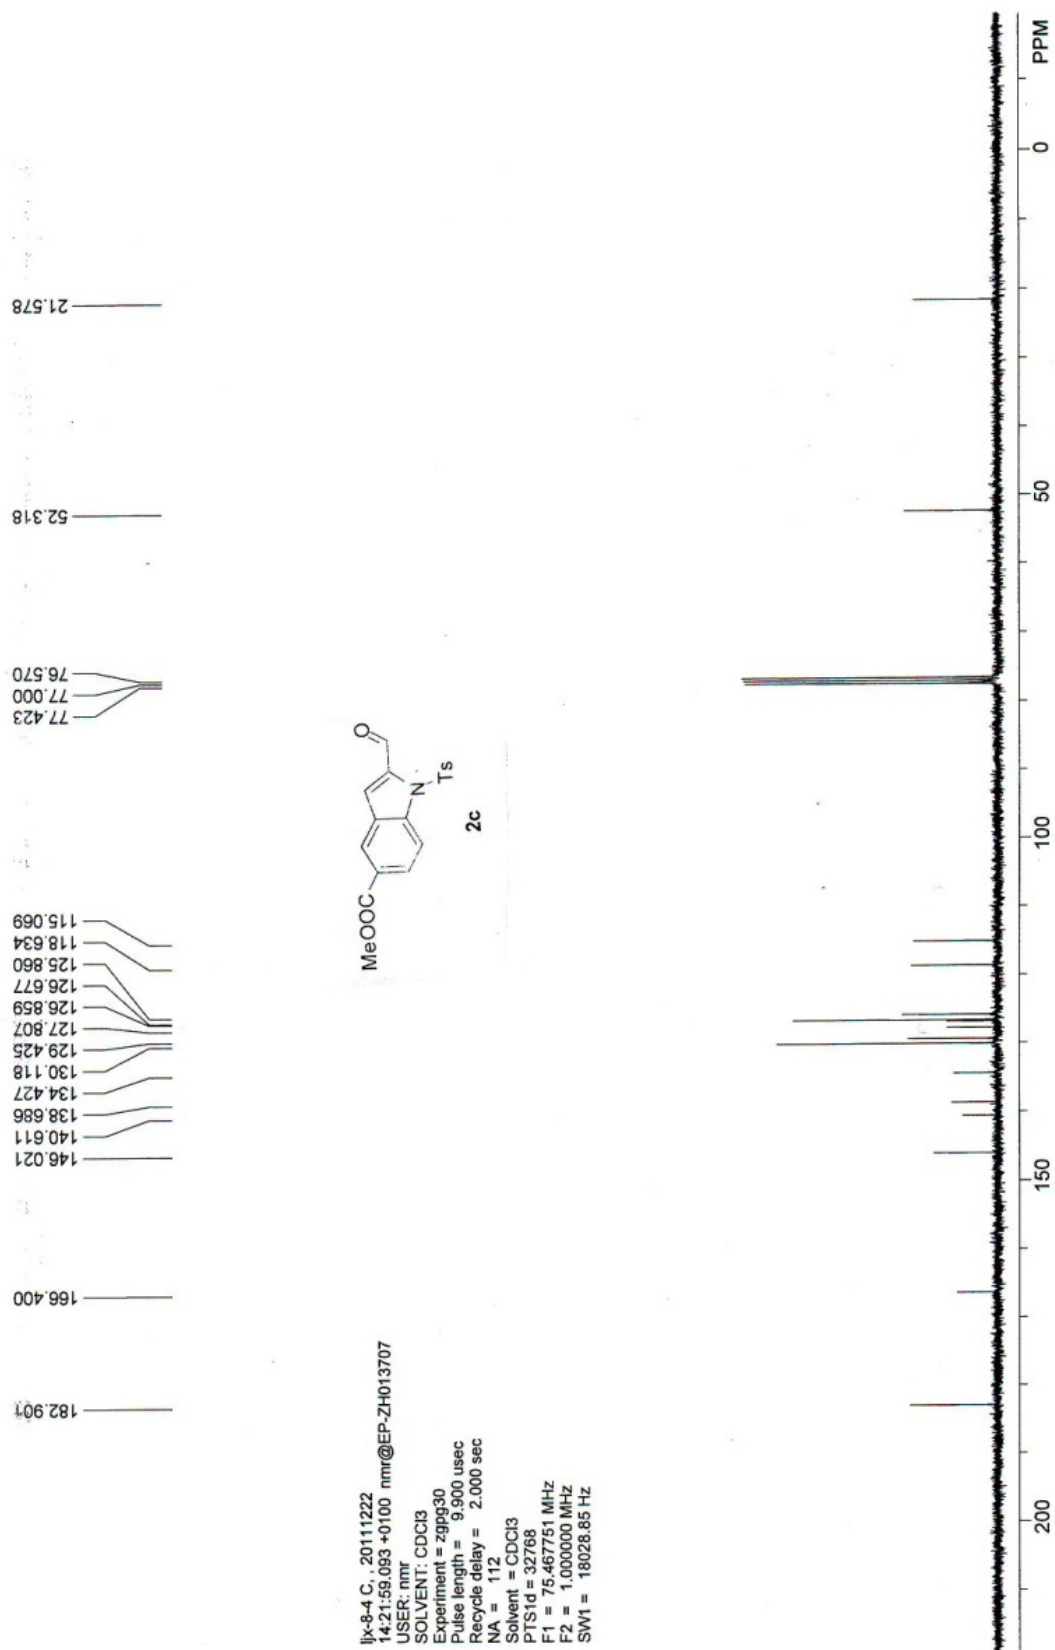



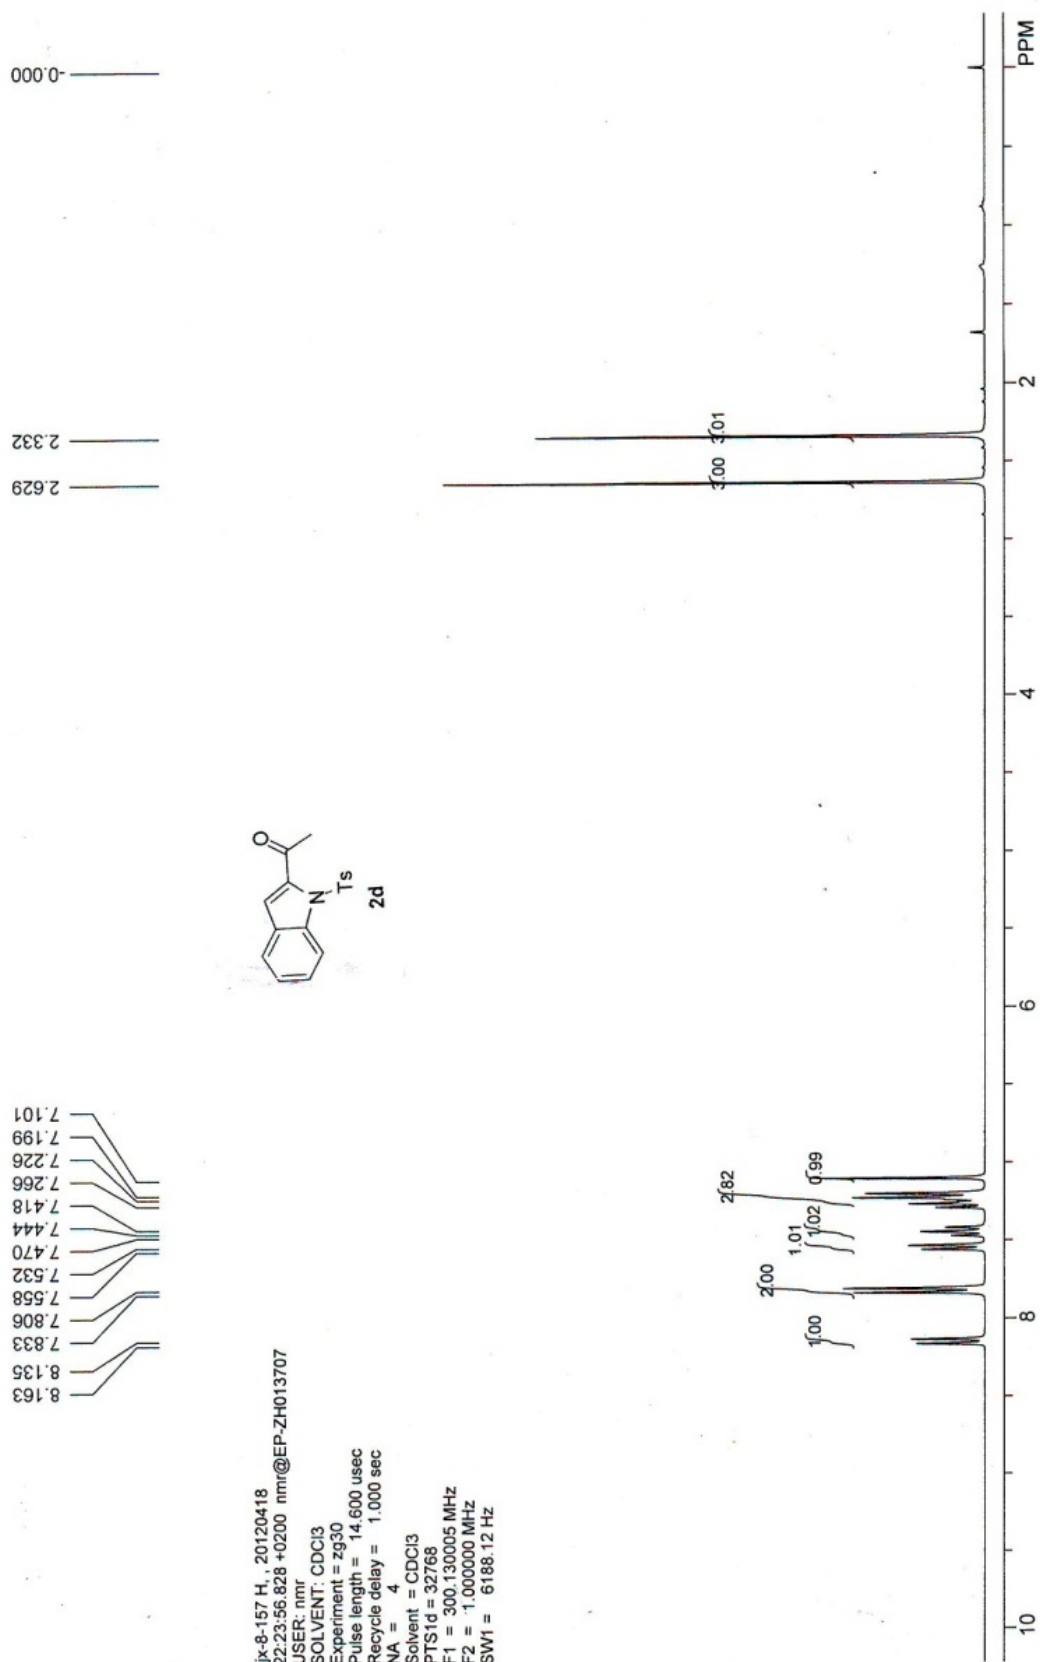

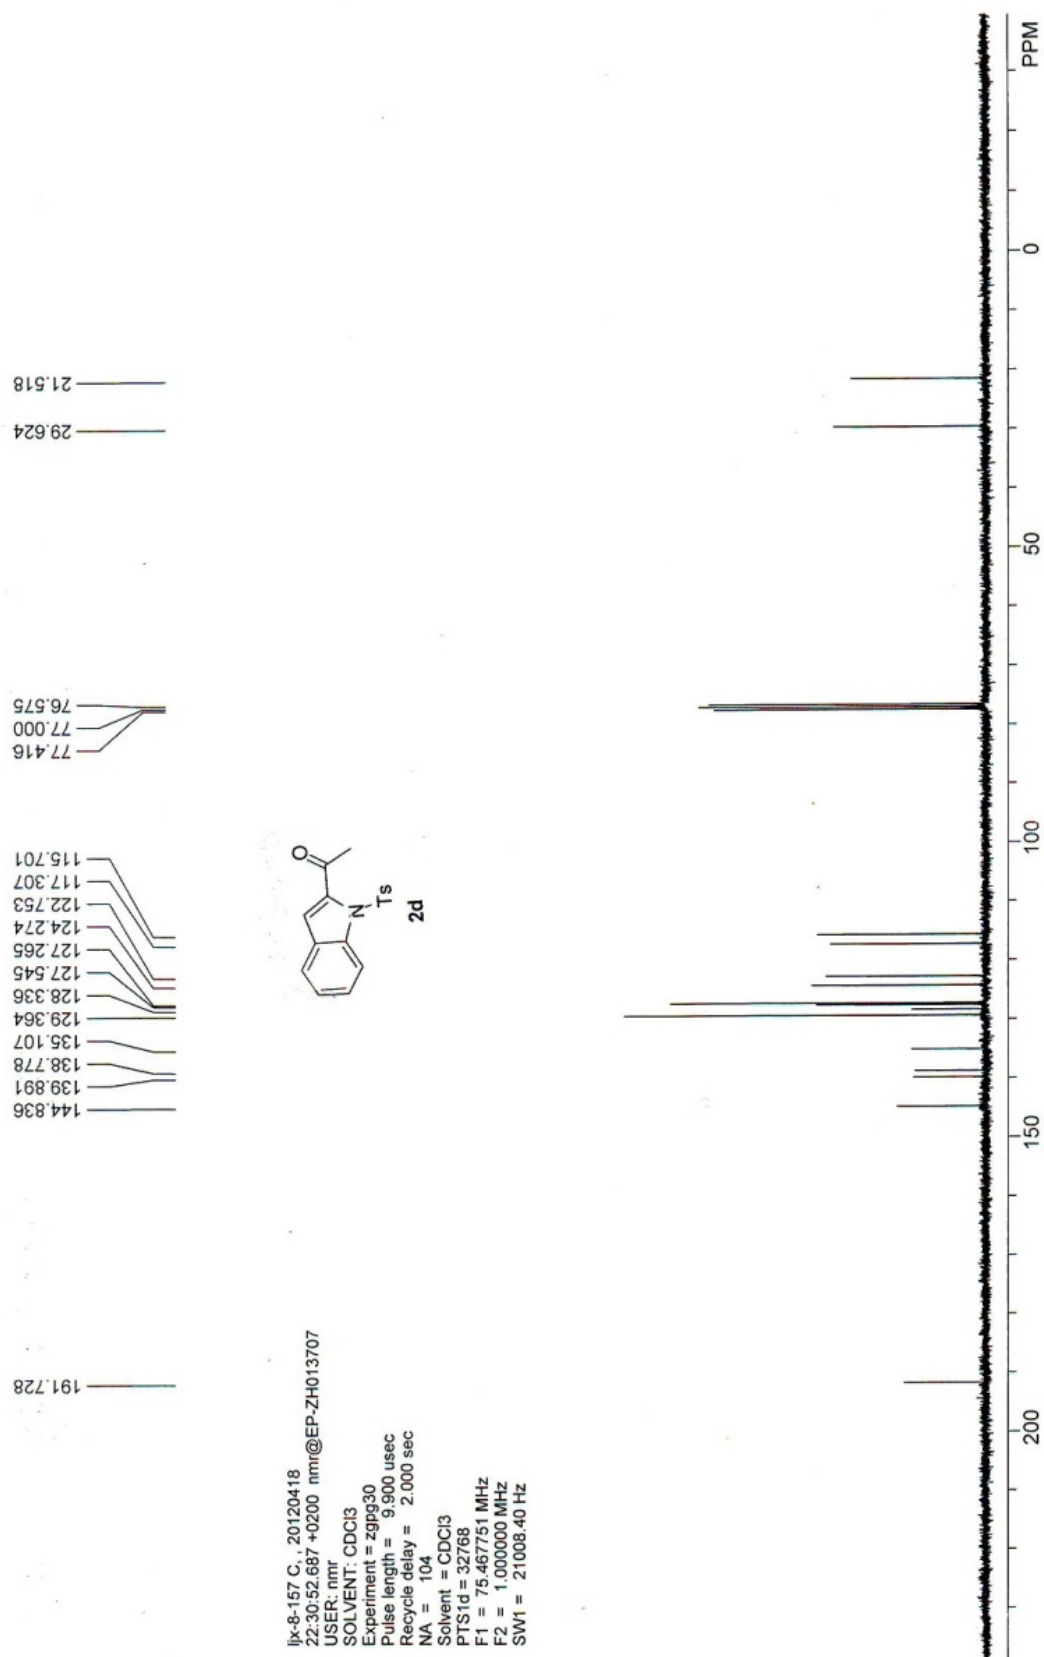

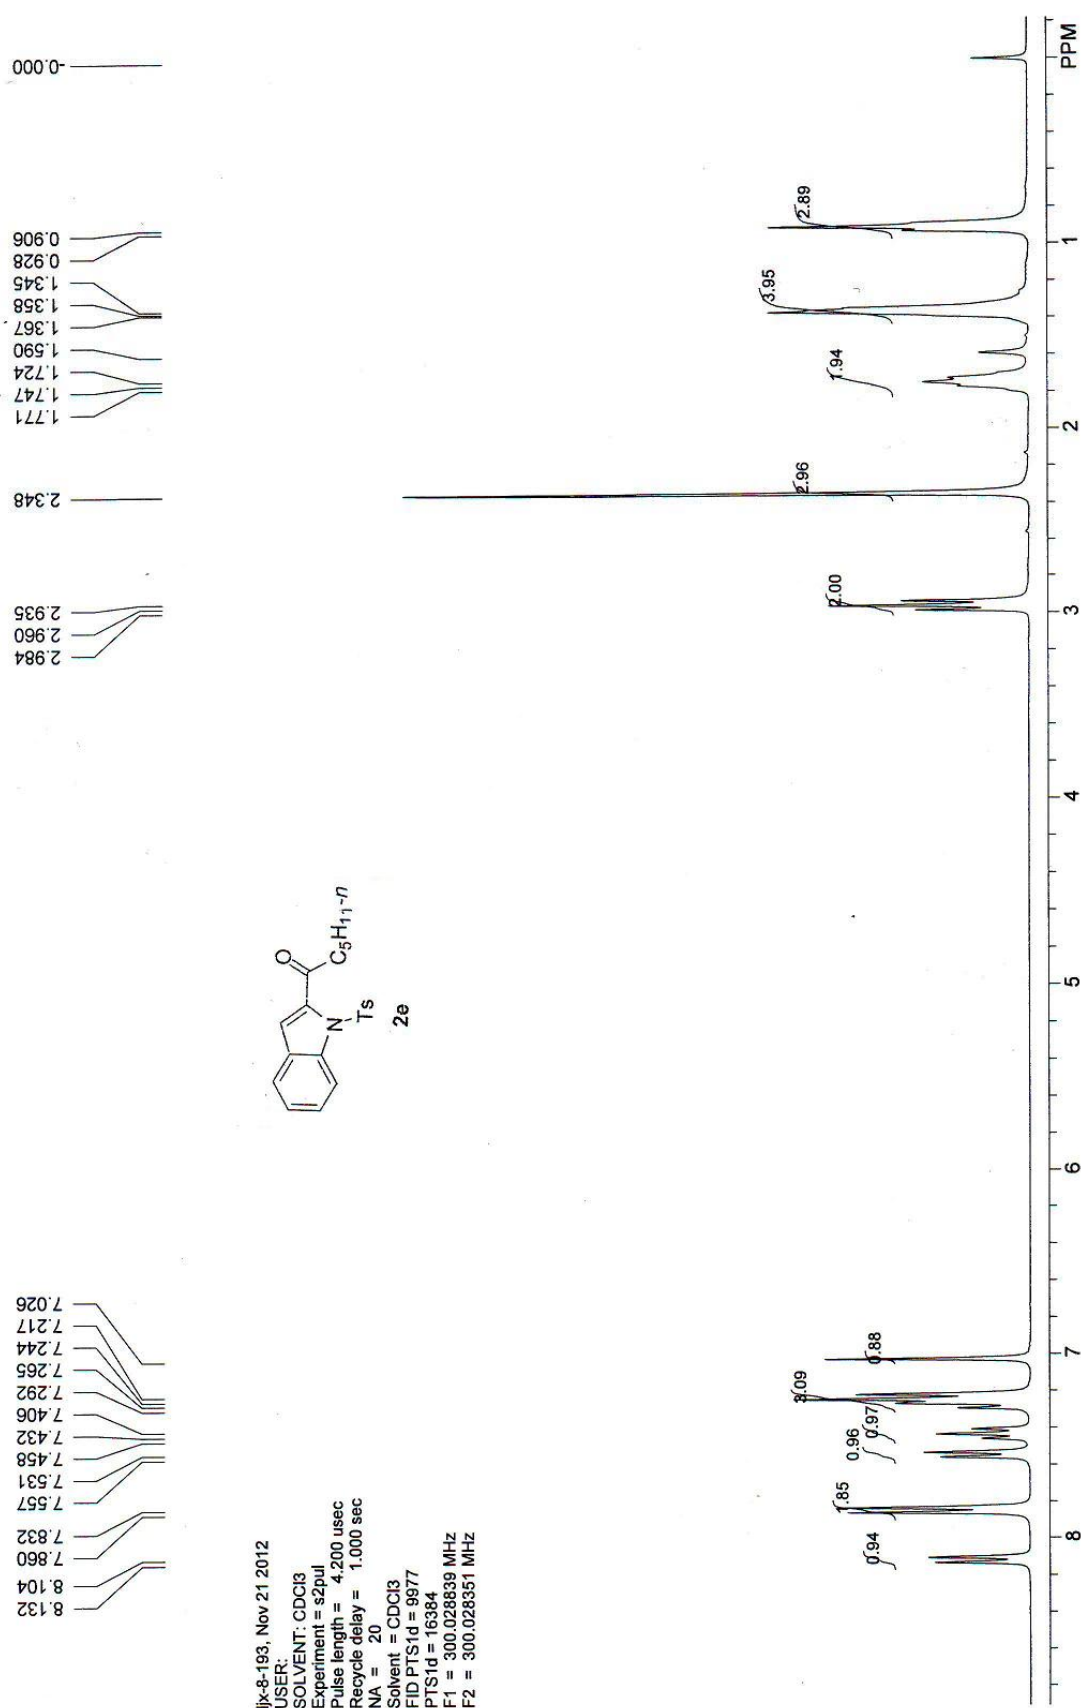

ljk-8-193, Nov 21 2012  
USER:  
SOLVENT: CDCl3  
Experiment = s2pul  
Pulse length = 4.200 usec  
Recycle delay = 1.000 sec  
NA = 20  
Solvent = CDCl3  
FID PTS1d = 9977  
PTS1d = 16384  
F1 = 300.028839 MHz  
F2 = 300.028351 MHz

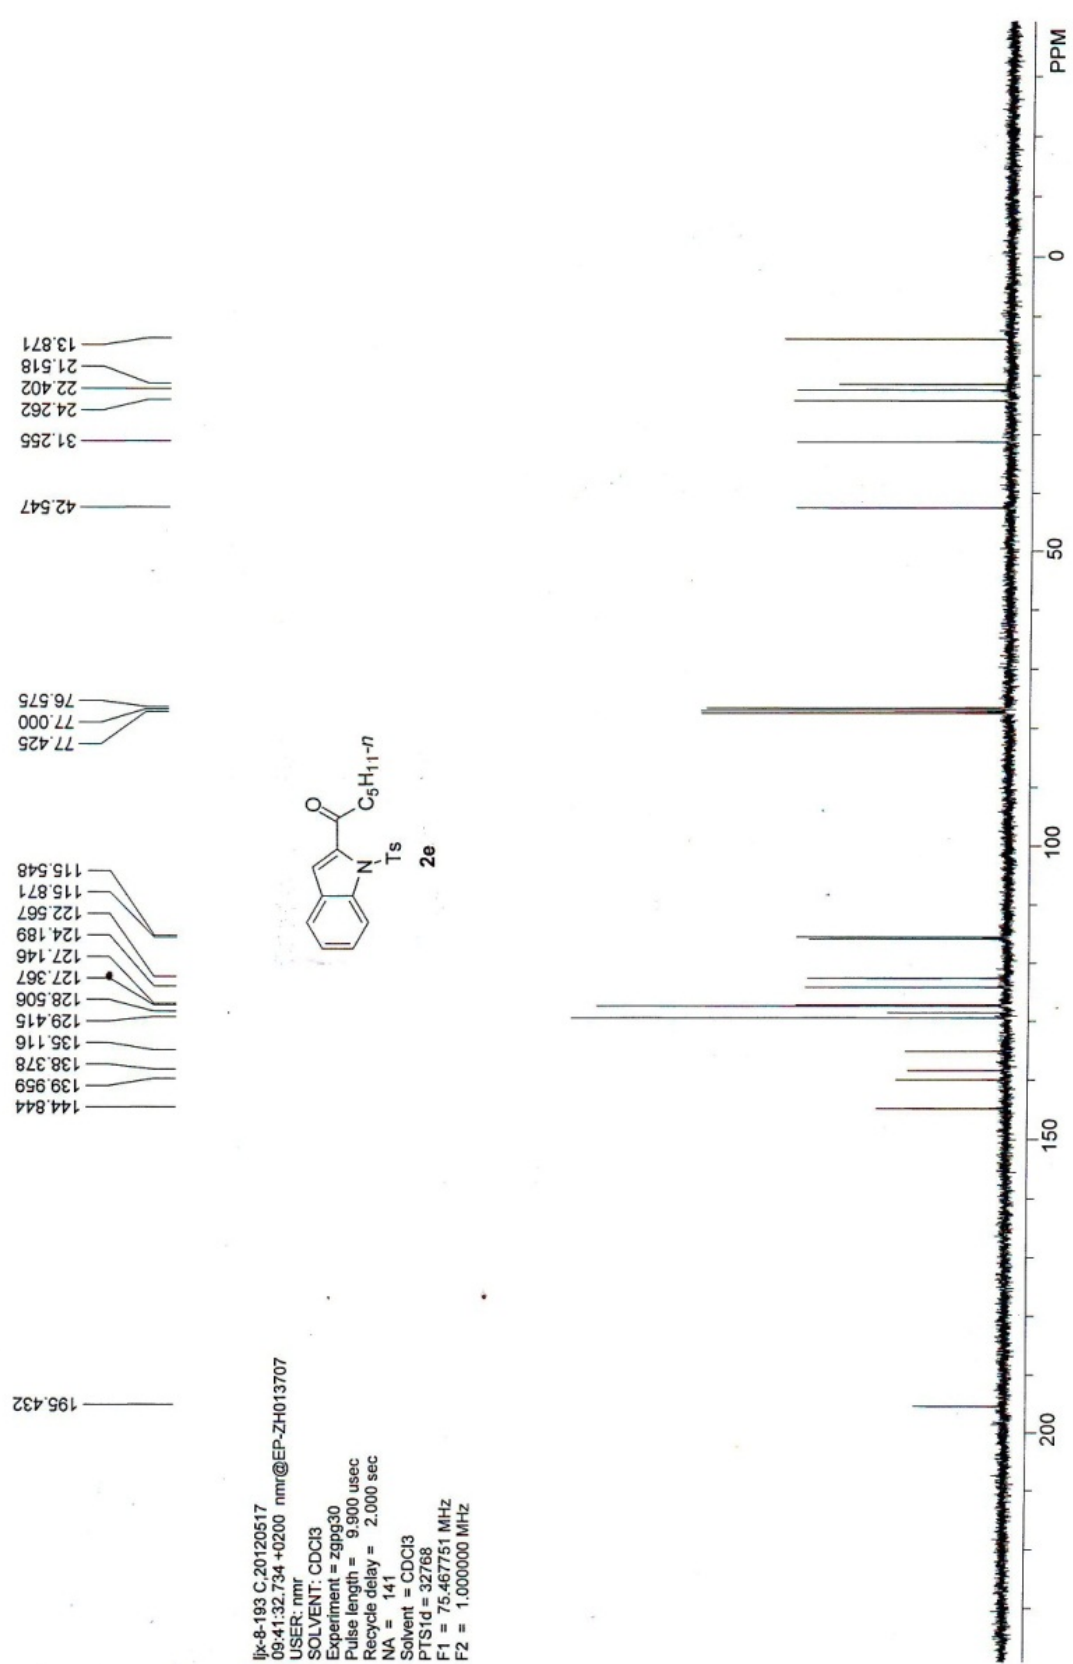

ljx-8-193 C:20120517  
09:41:32.734 -0200 nmr@EP-ZH013707  
USER: nmr  
SOLVENT: CDCl3  
Experiment = zgpg30  
Pulse length = 9.900 usec  
Recycle delay = 2.000 sec  
NA = 141  
Solvent = CDCl3  
PTSD = 32768  
F1 = 75.467751 MHz  
F2 = 1.000000 MHz

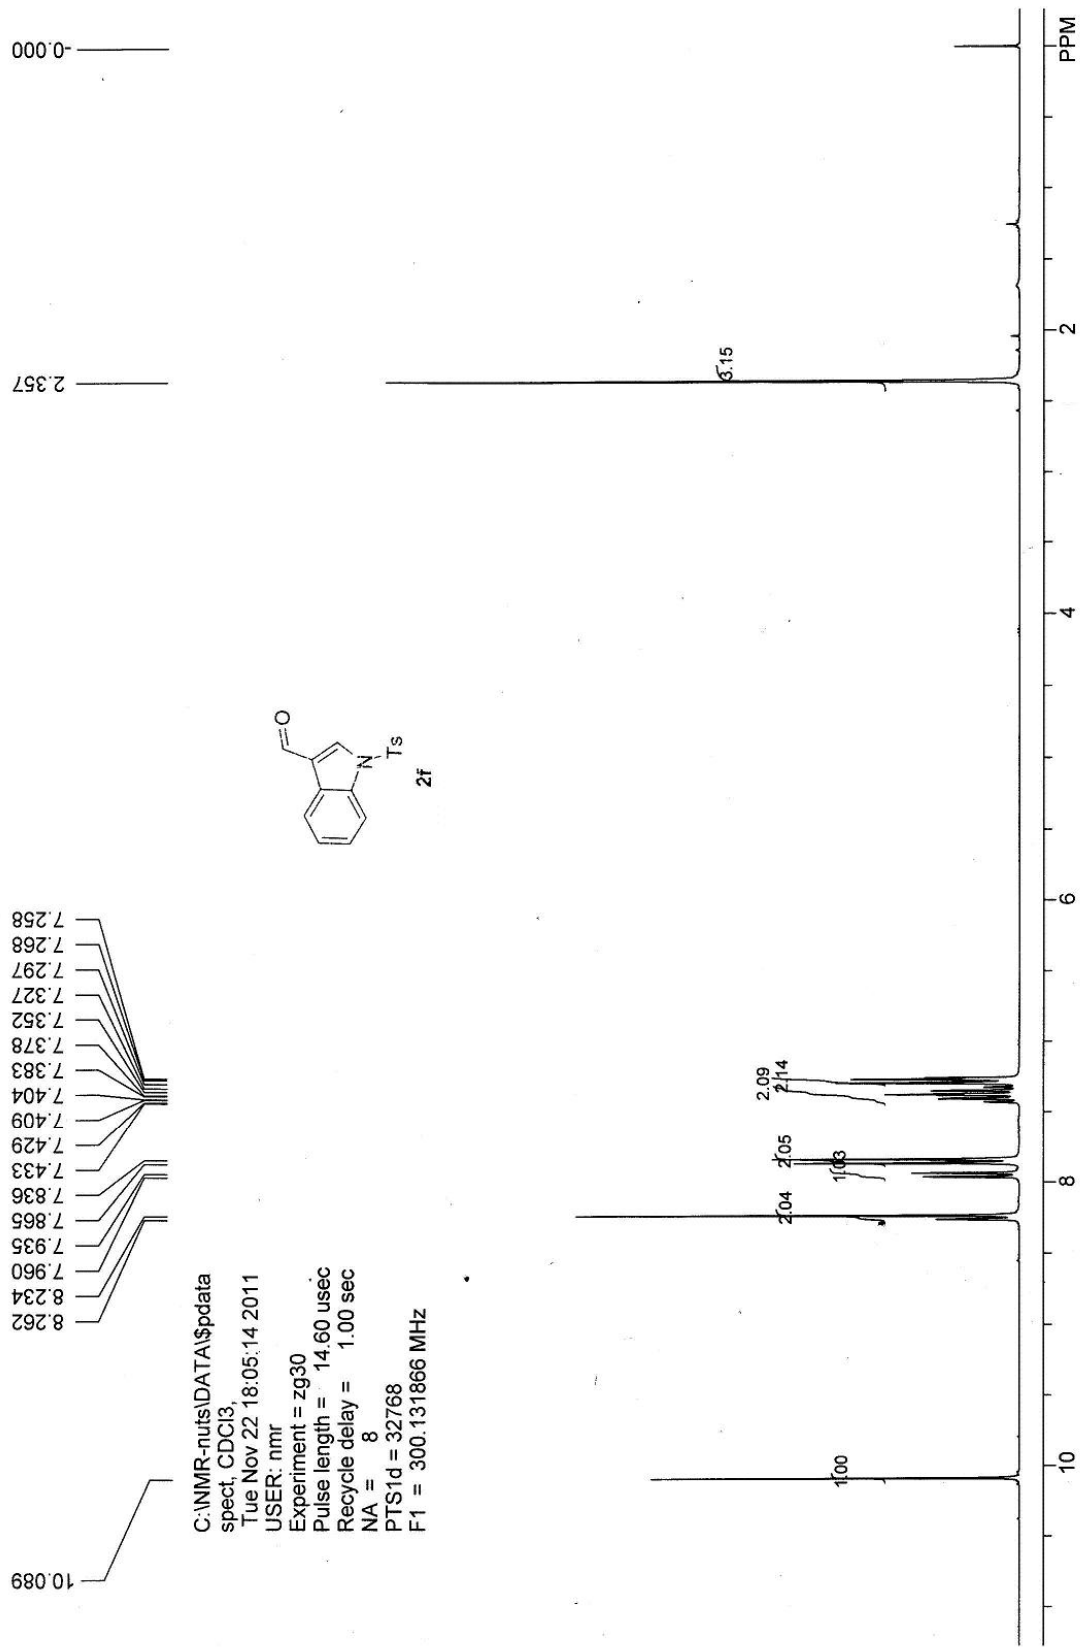

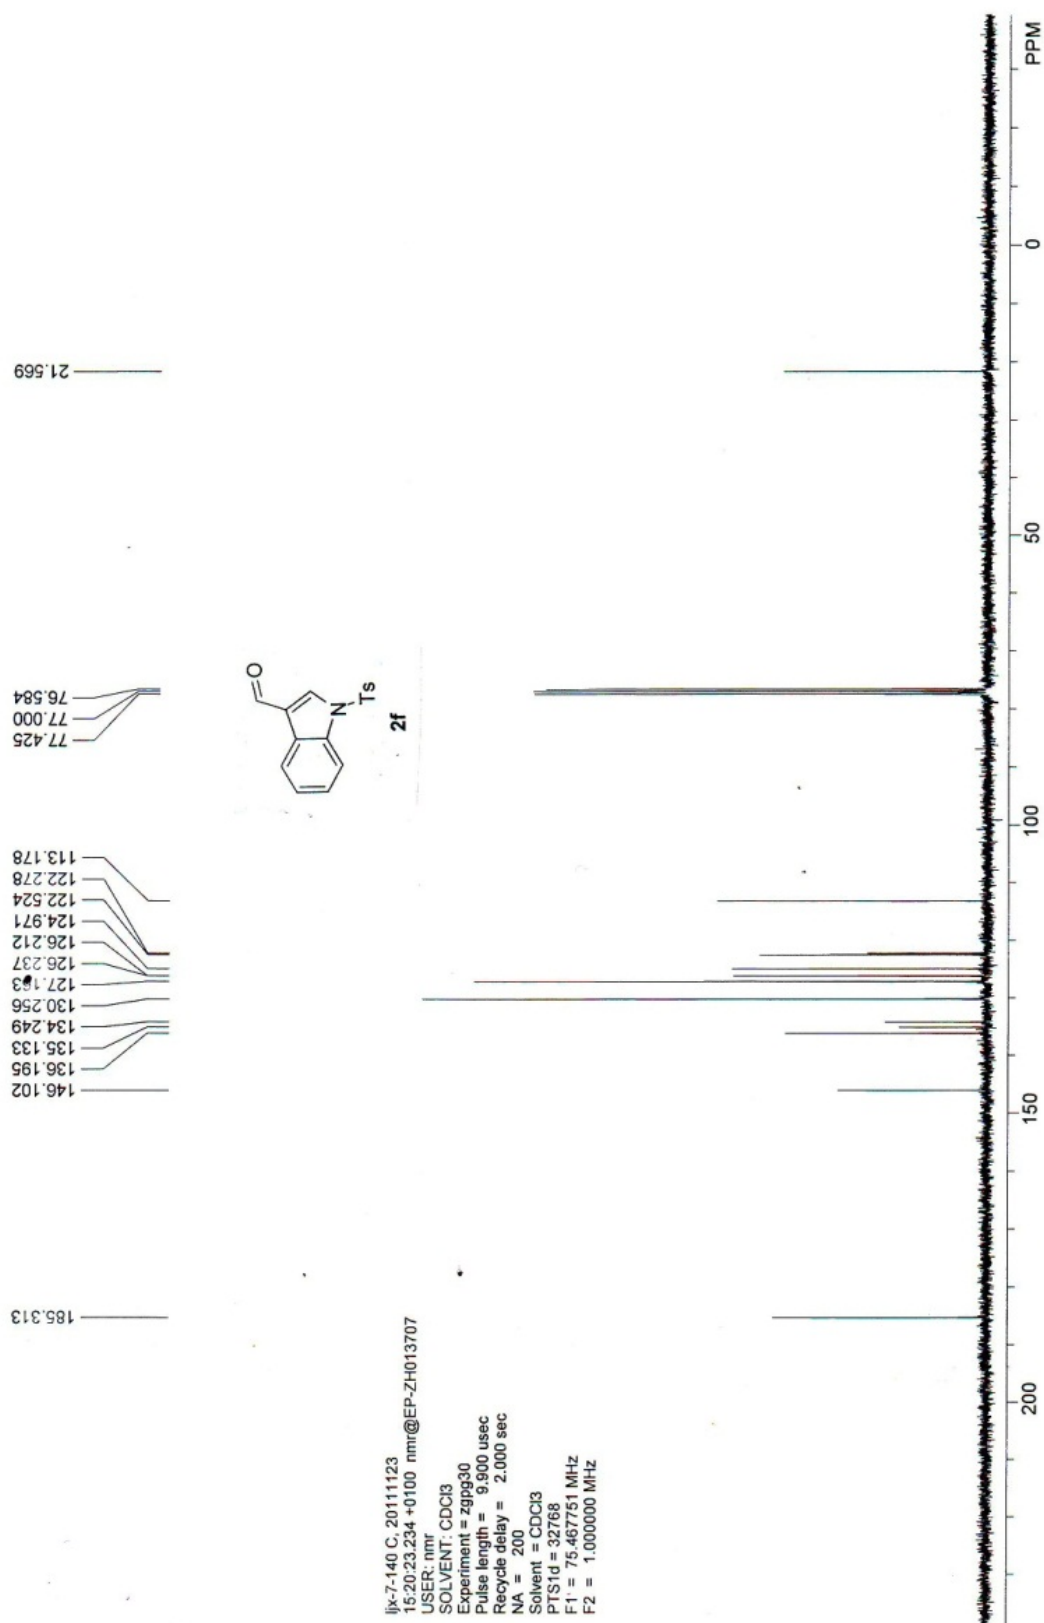

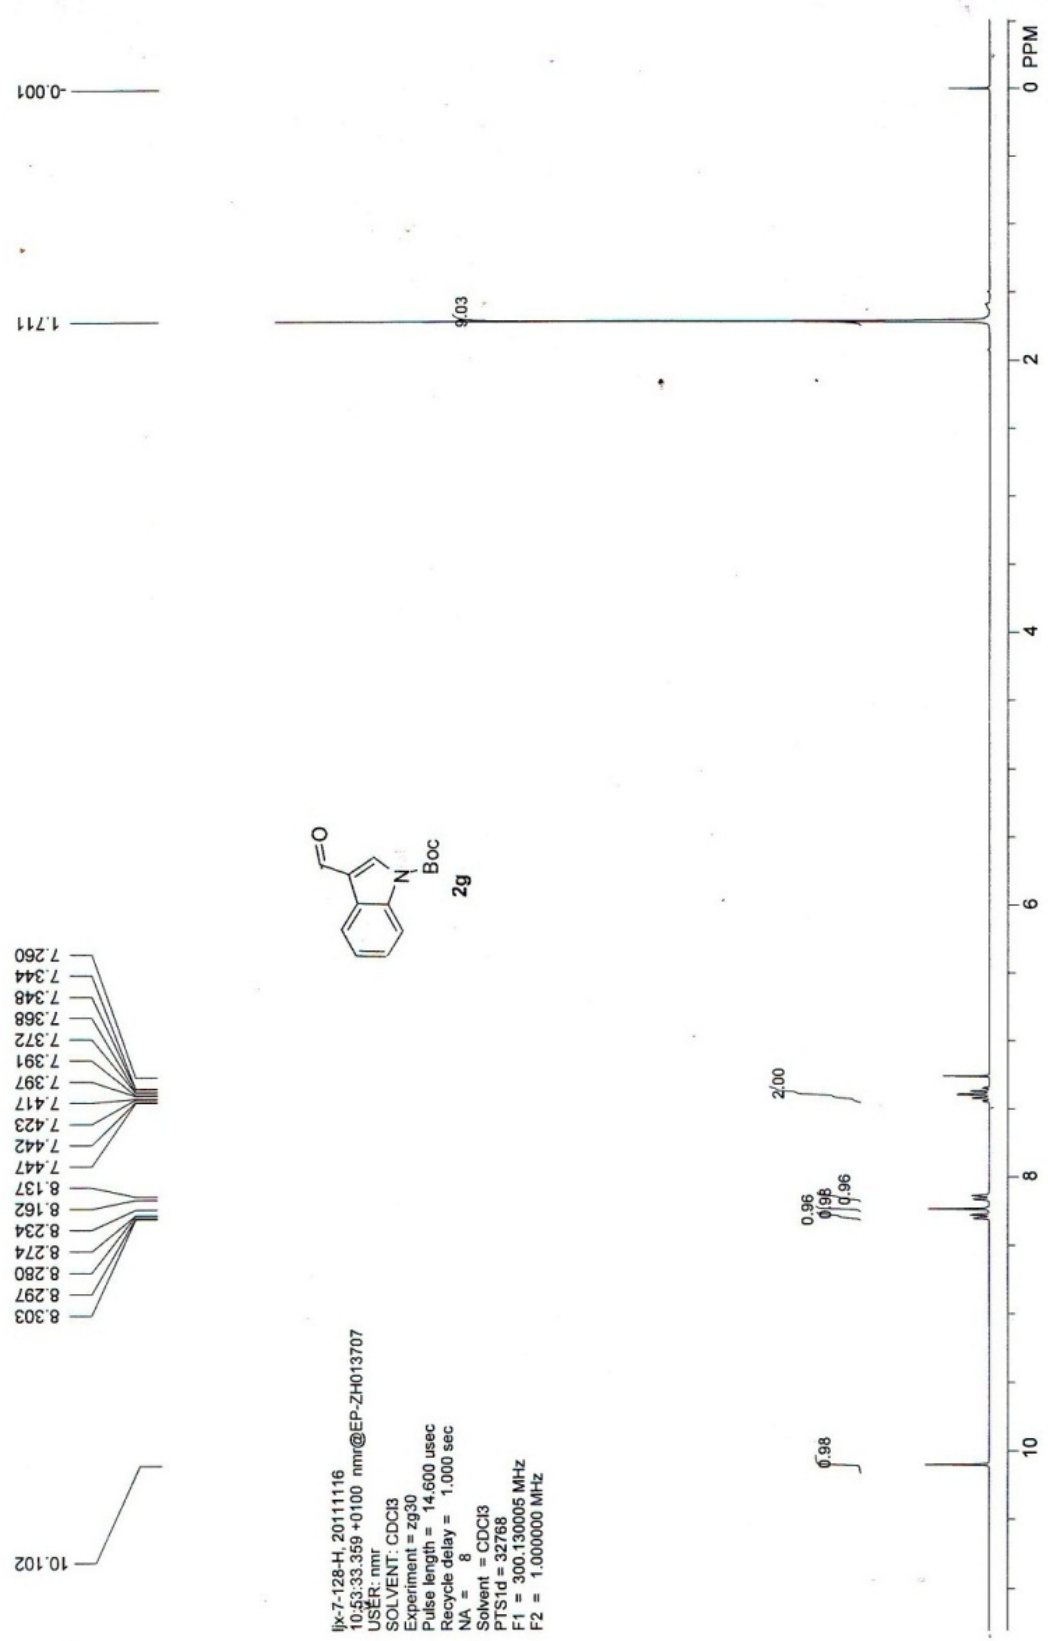

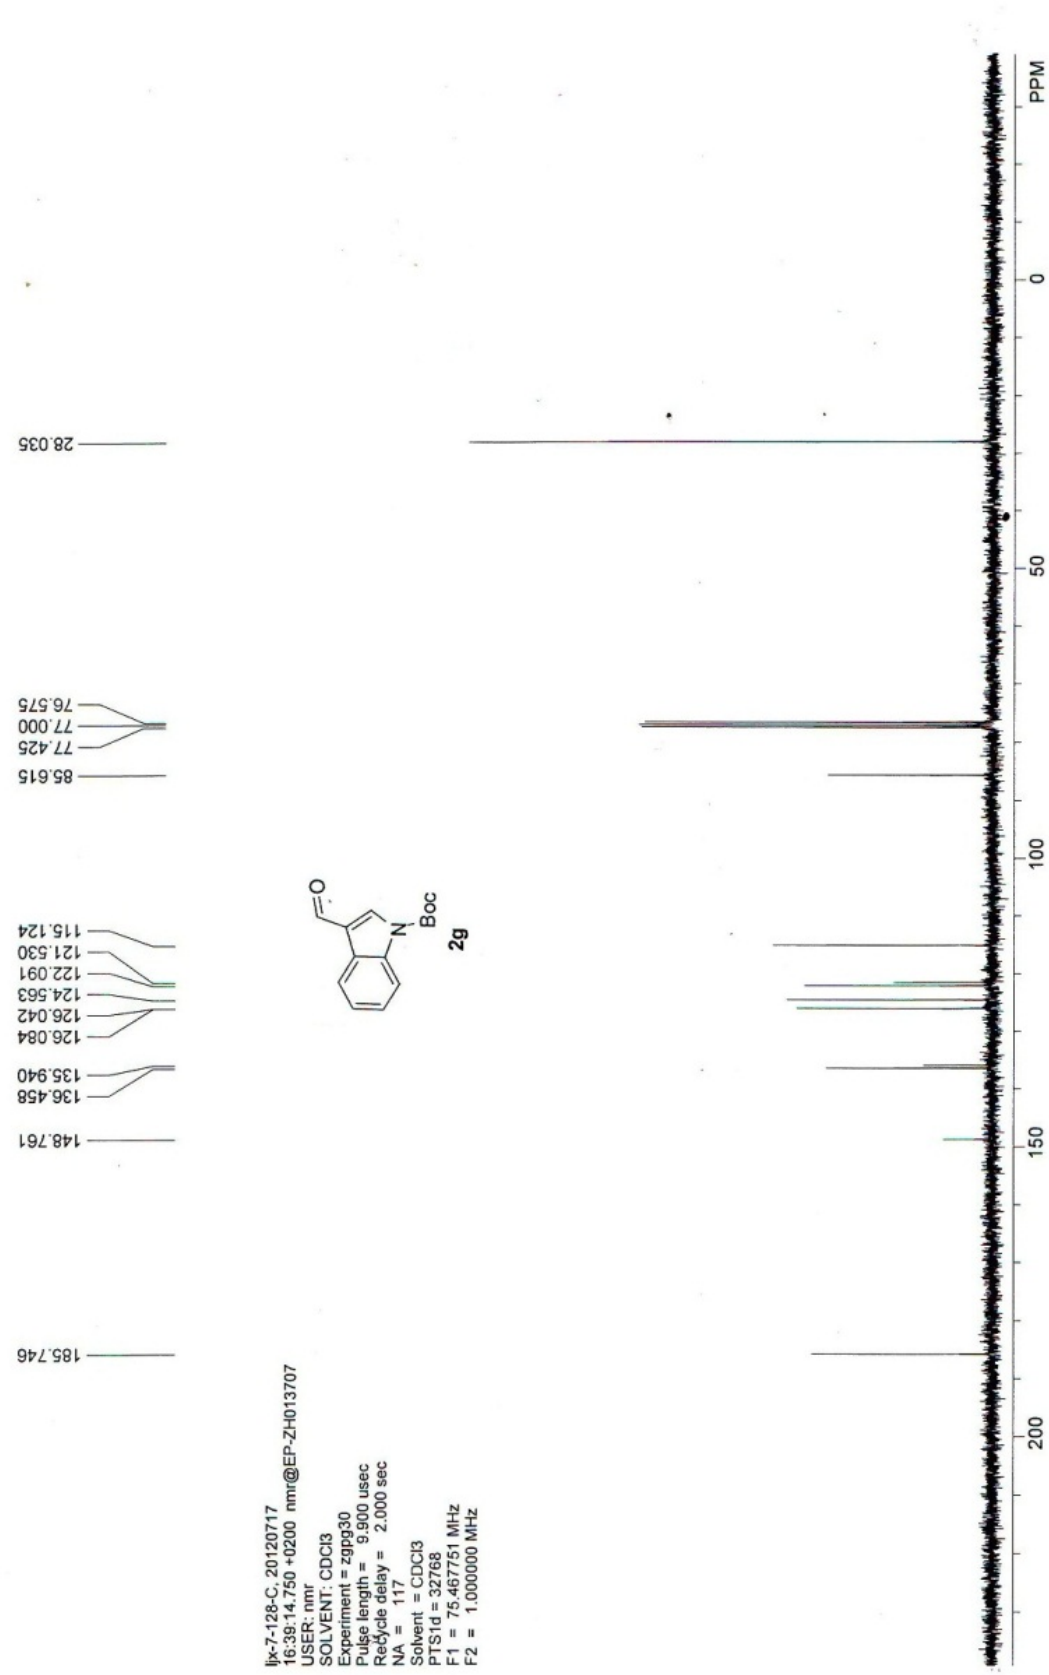



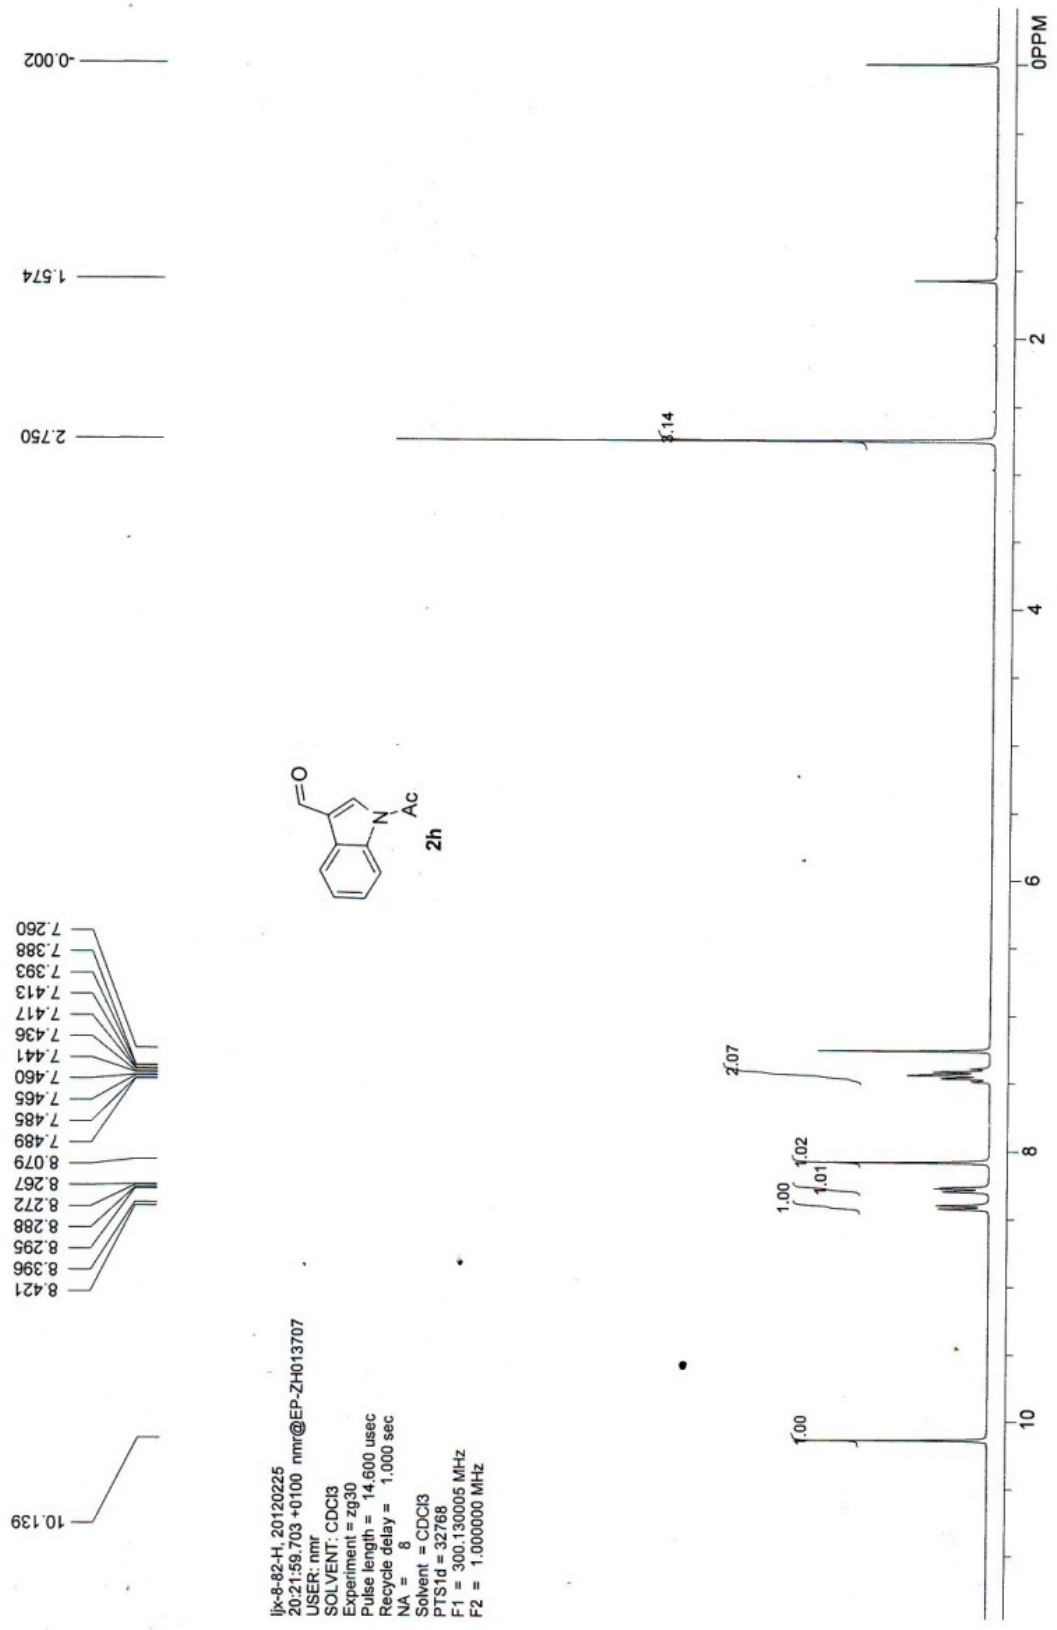

ljx-8-82-H, 20120225  
20:21:59.703 +0100 nmr@EP-ZH013707  
USER: nmr  
SOLVENT: CDCl<sub>3</sub>  
Experiment = zg30  
Pulse length = 14.600 usec  
Recycle delay = 1.000 sec  
NA = 8  
Solvent = CDCl<sub>3</sub>  
PTS1d = 32788  
F1 = 300.130005 MHz  
F2 = 1.000000 MHz

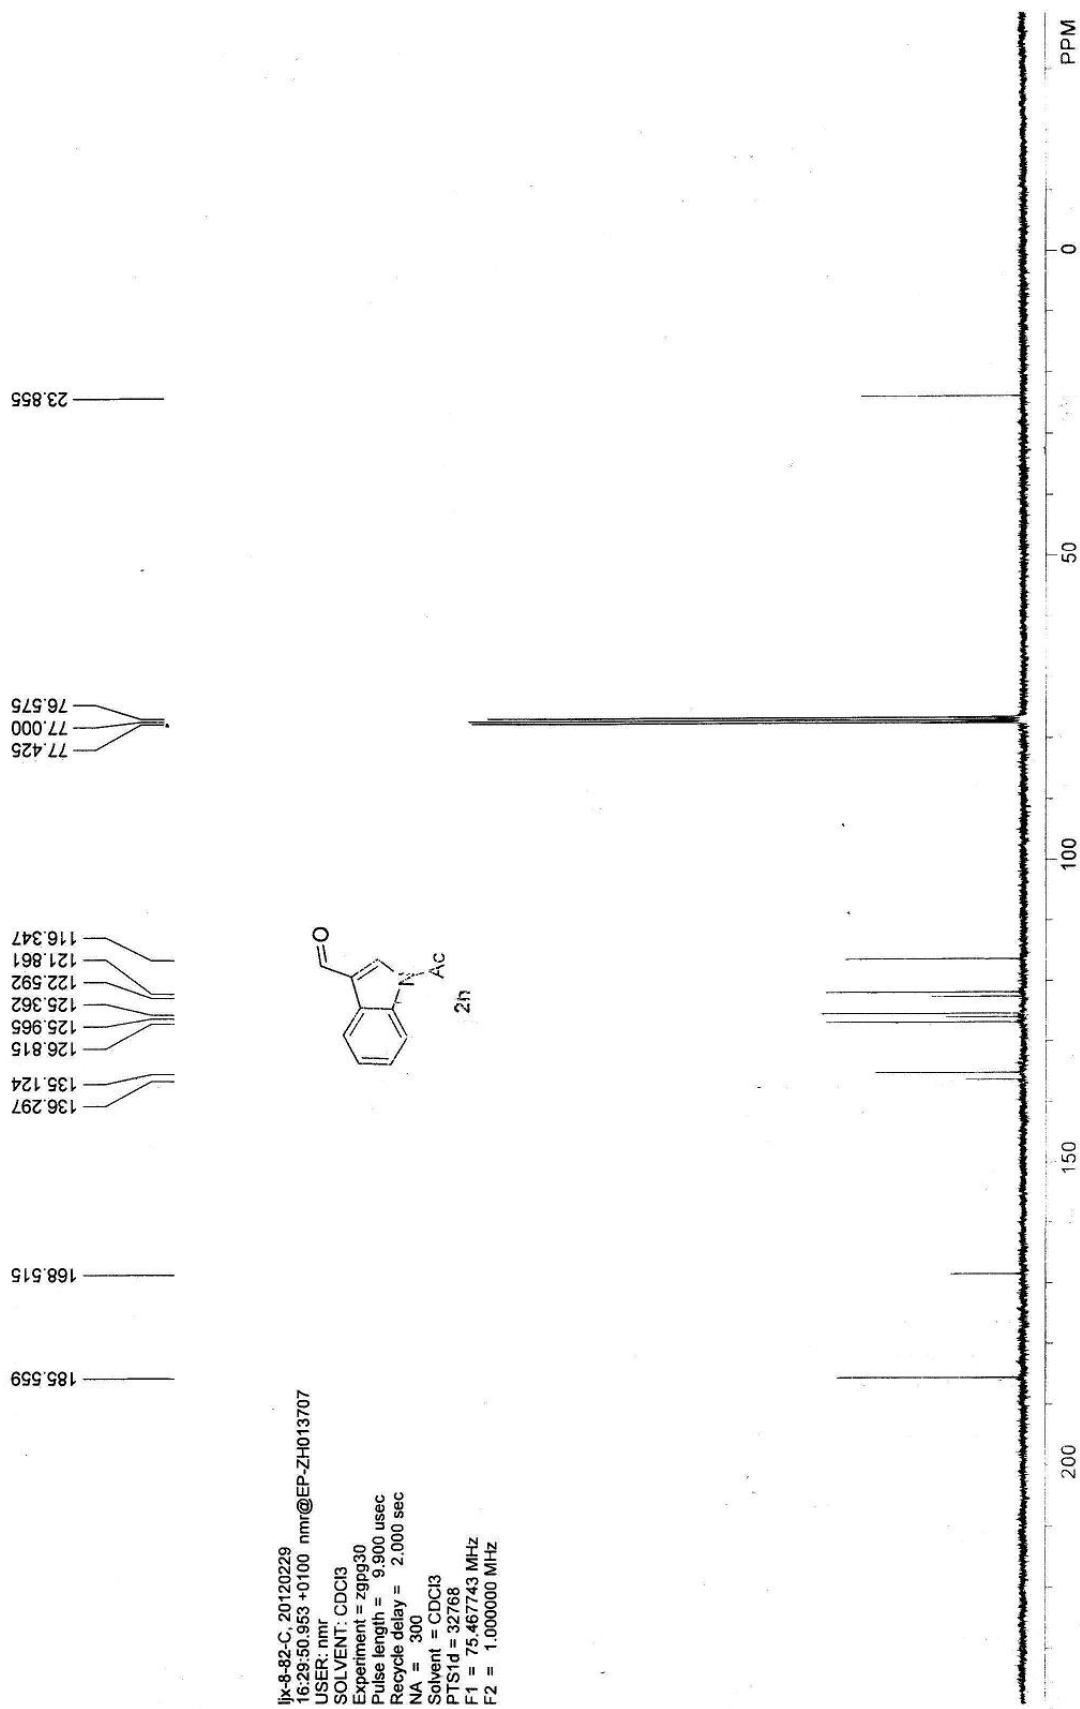

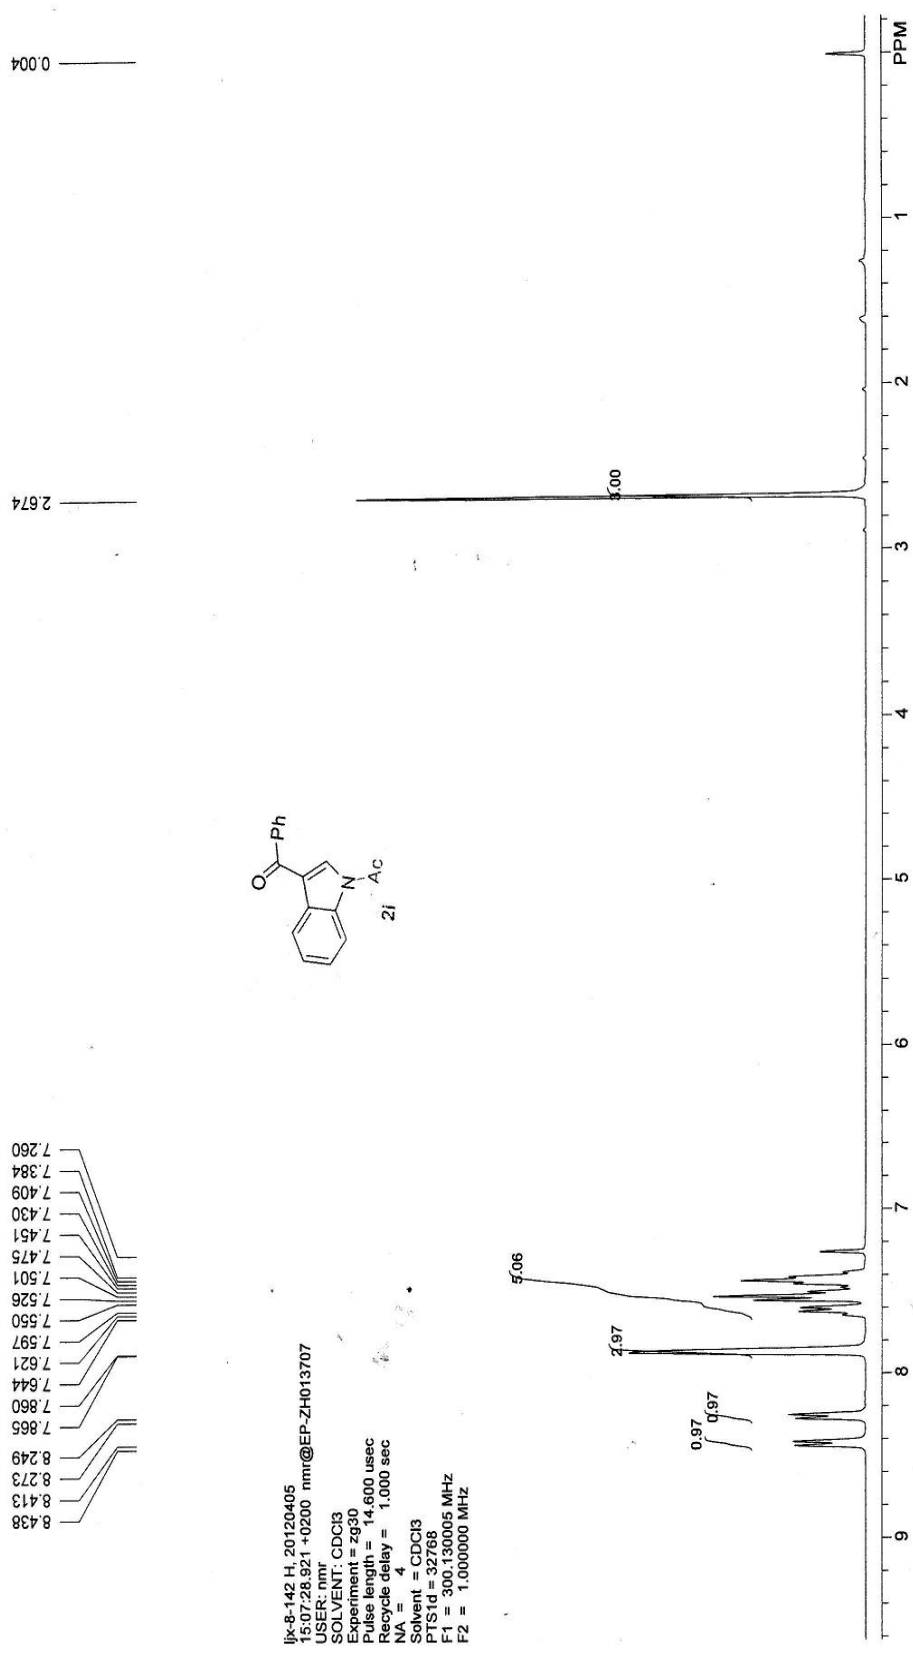

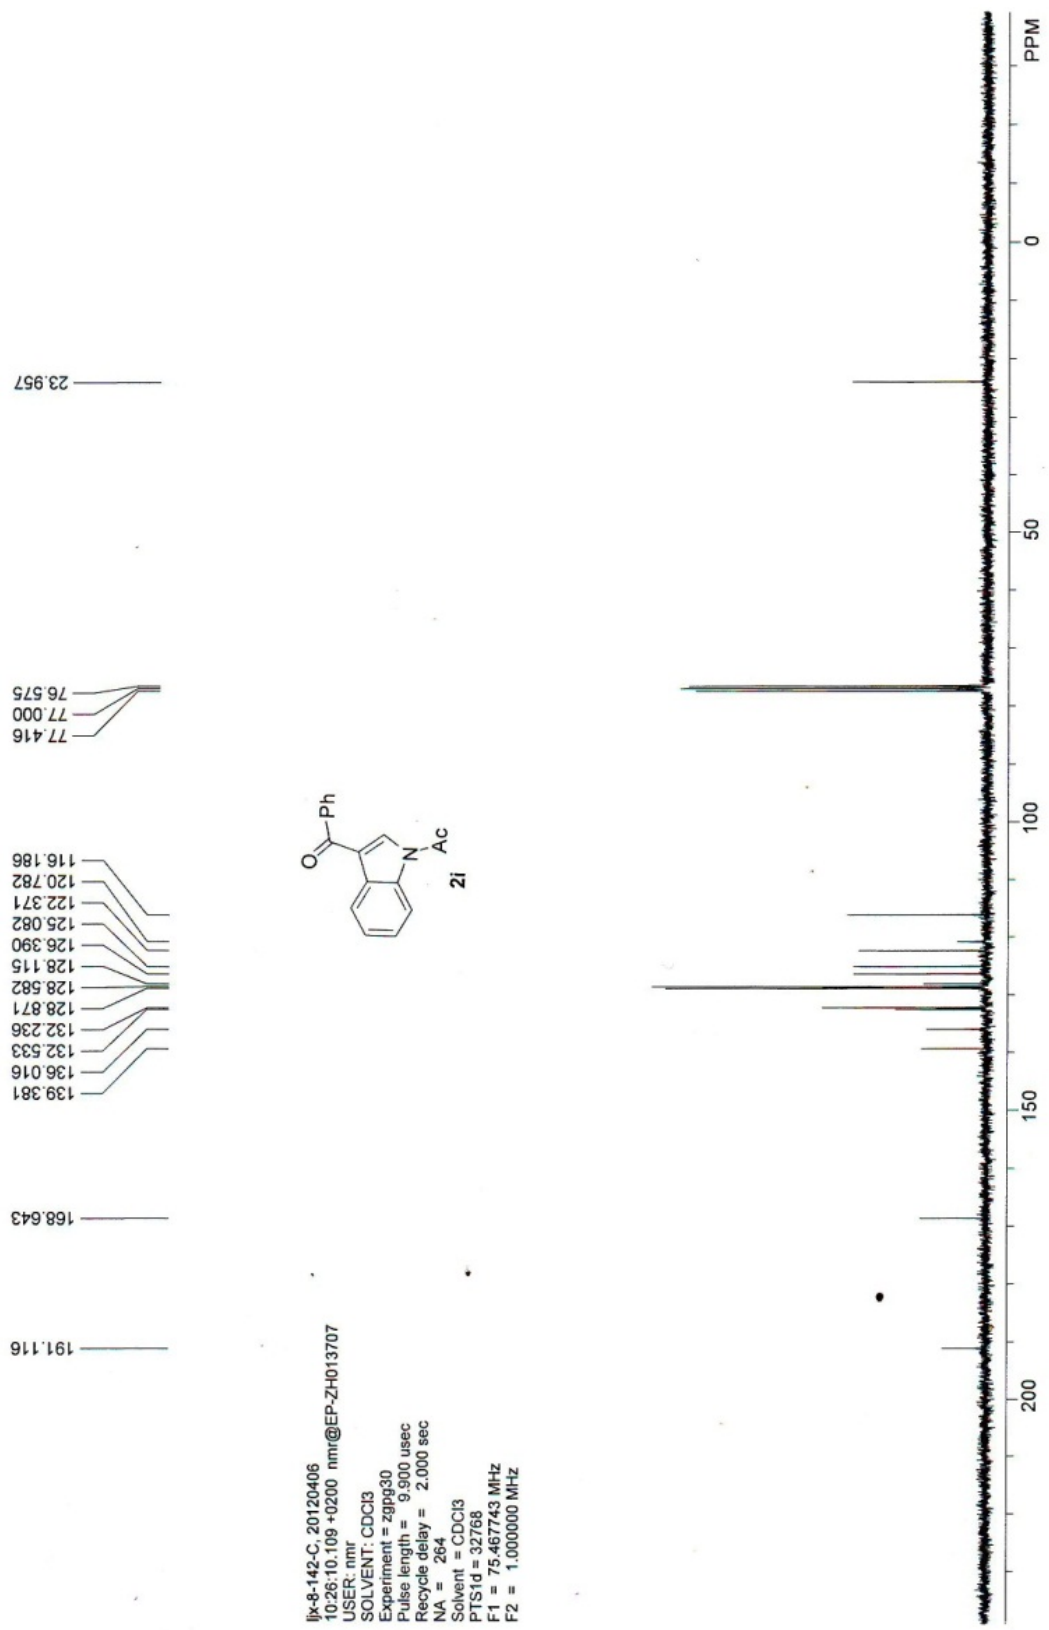

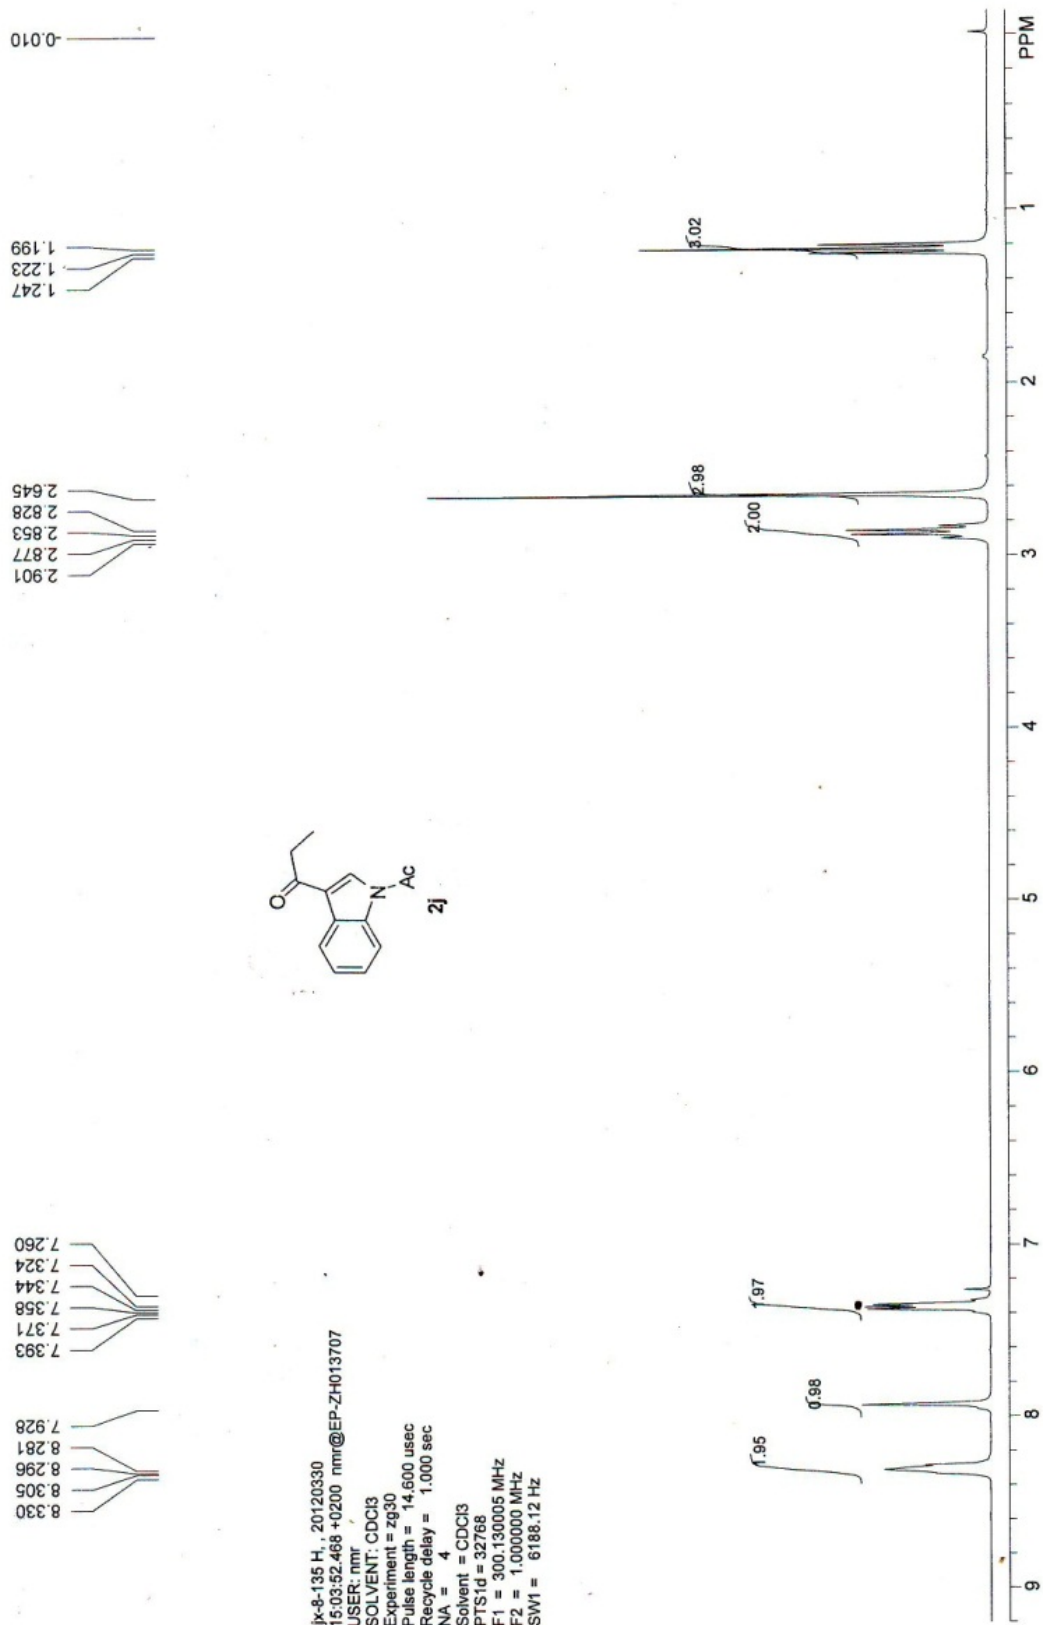

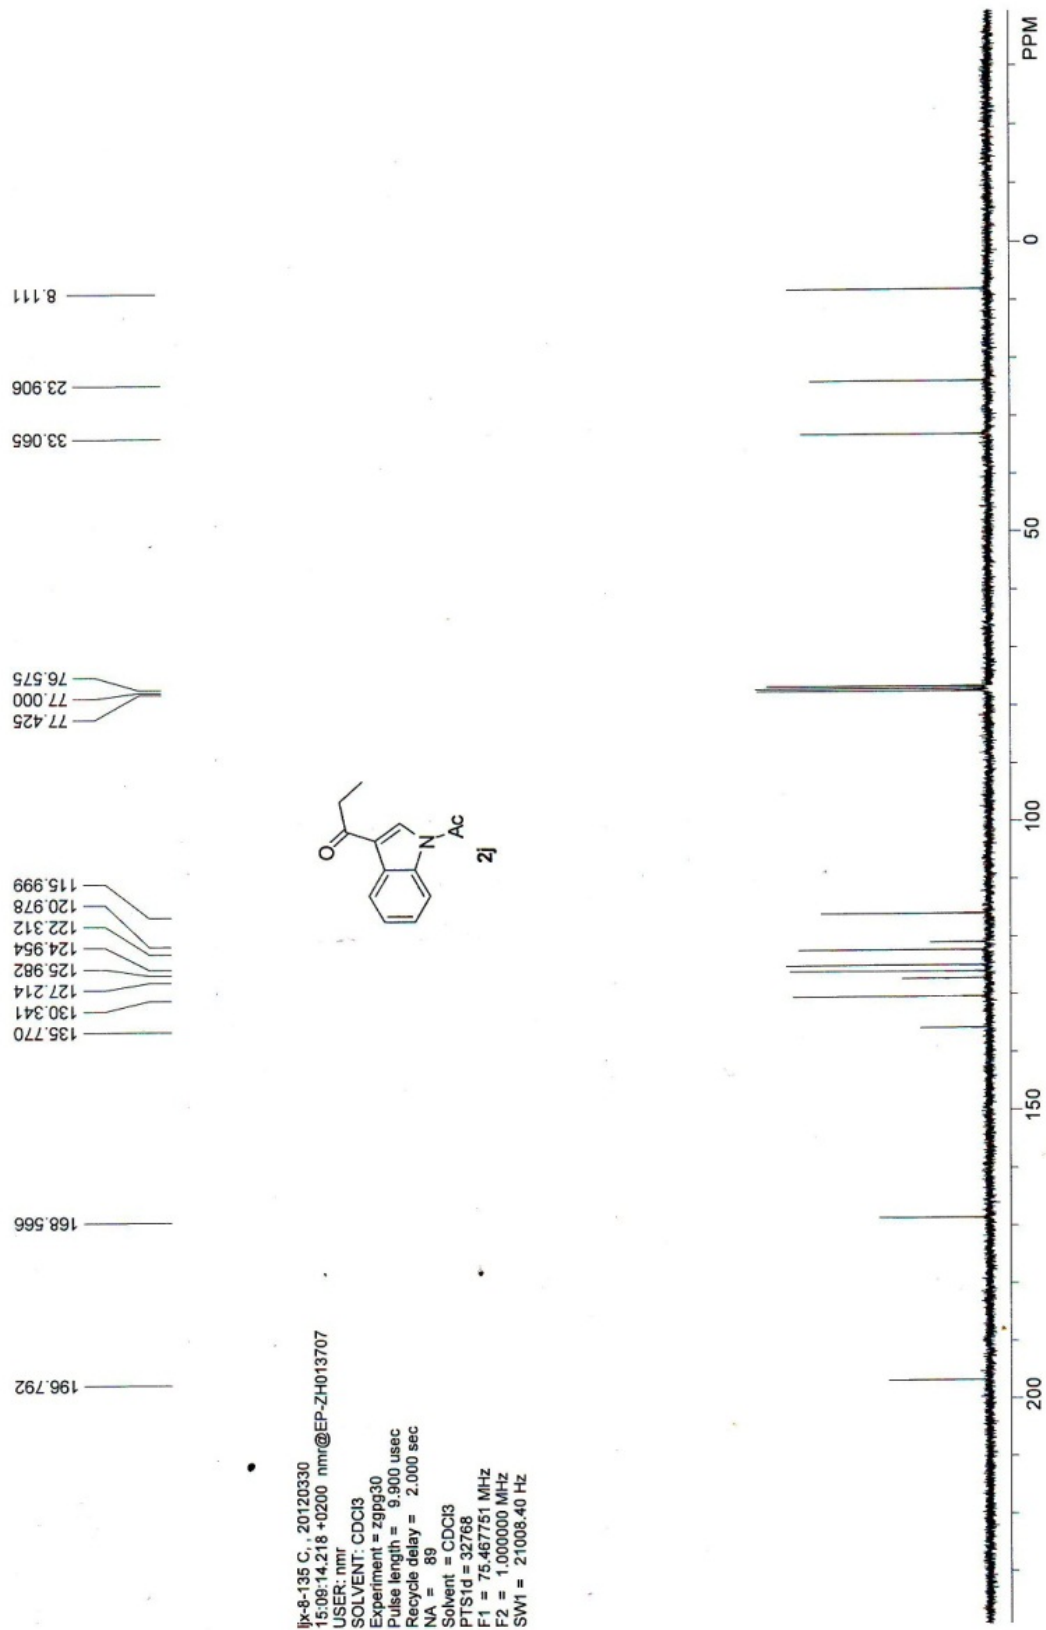

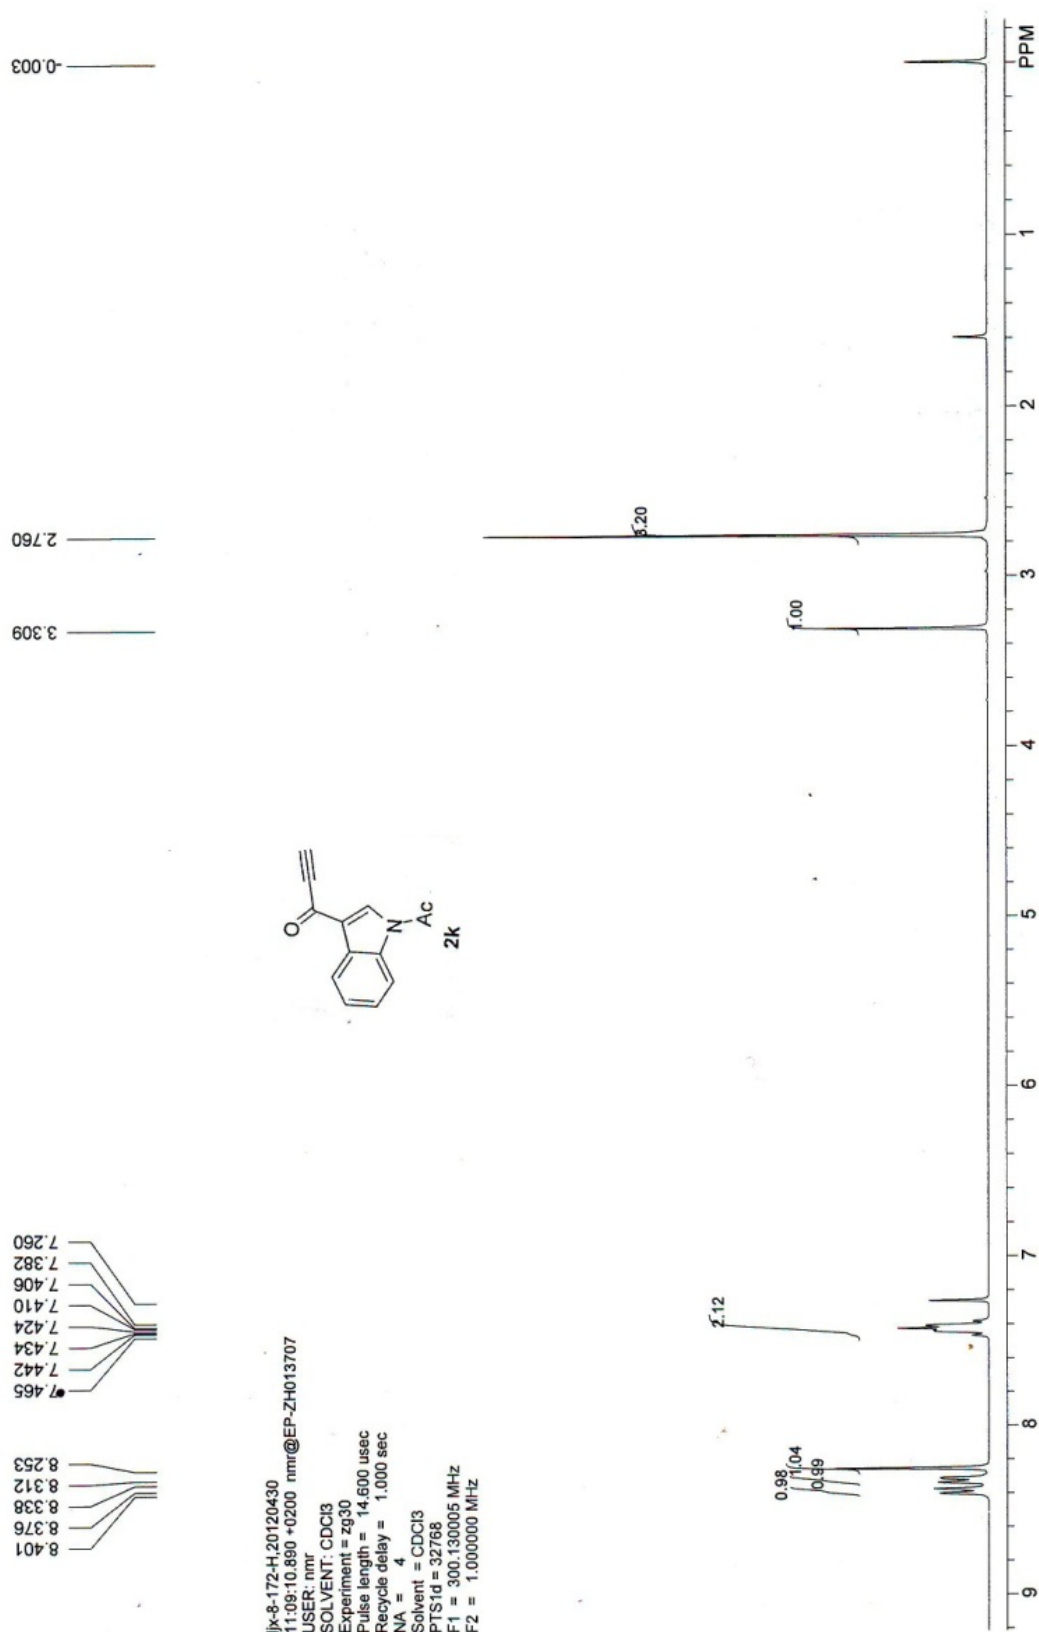

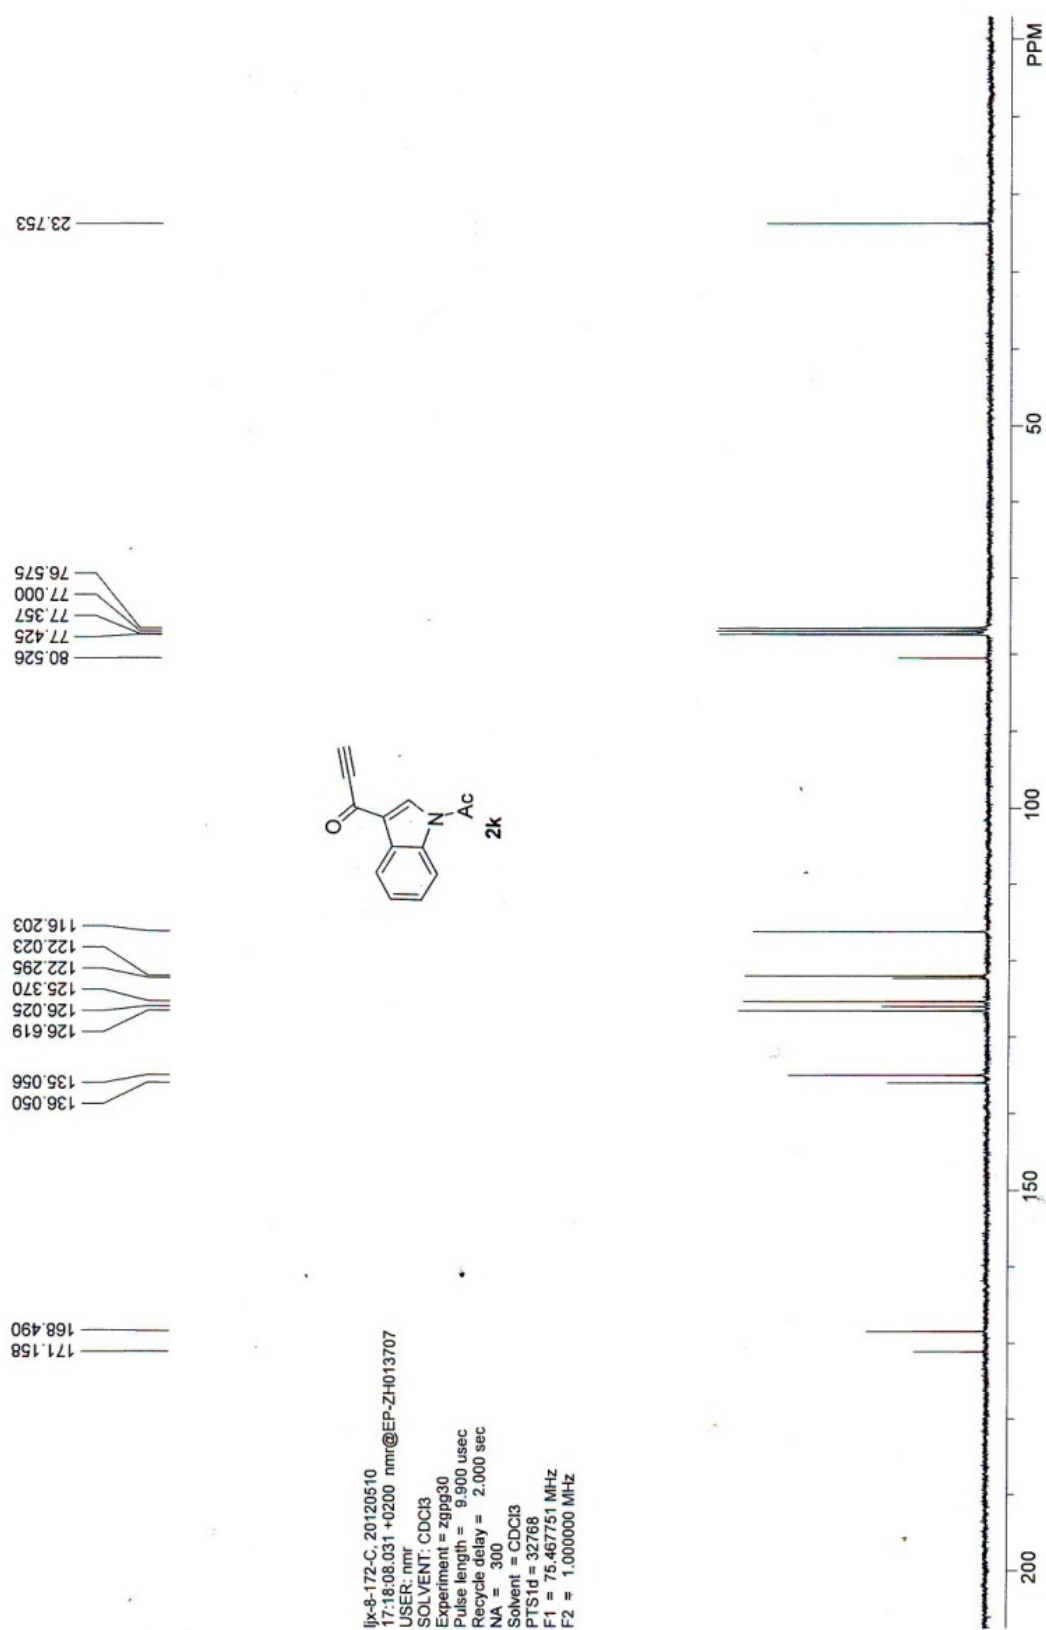



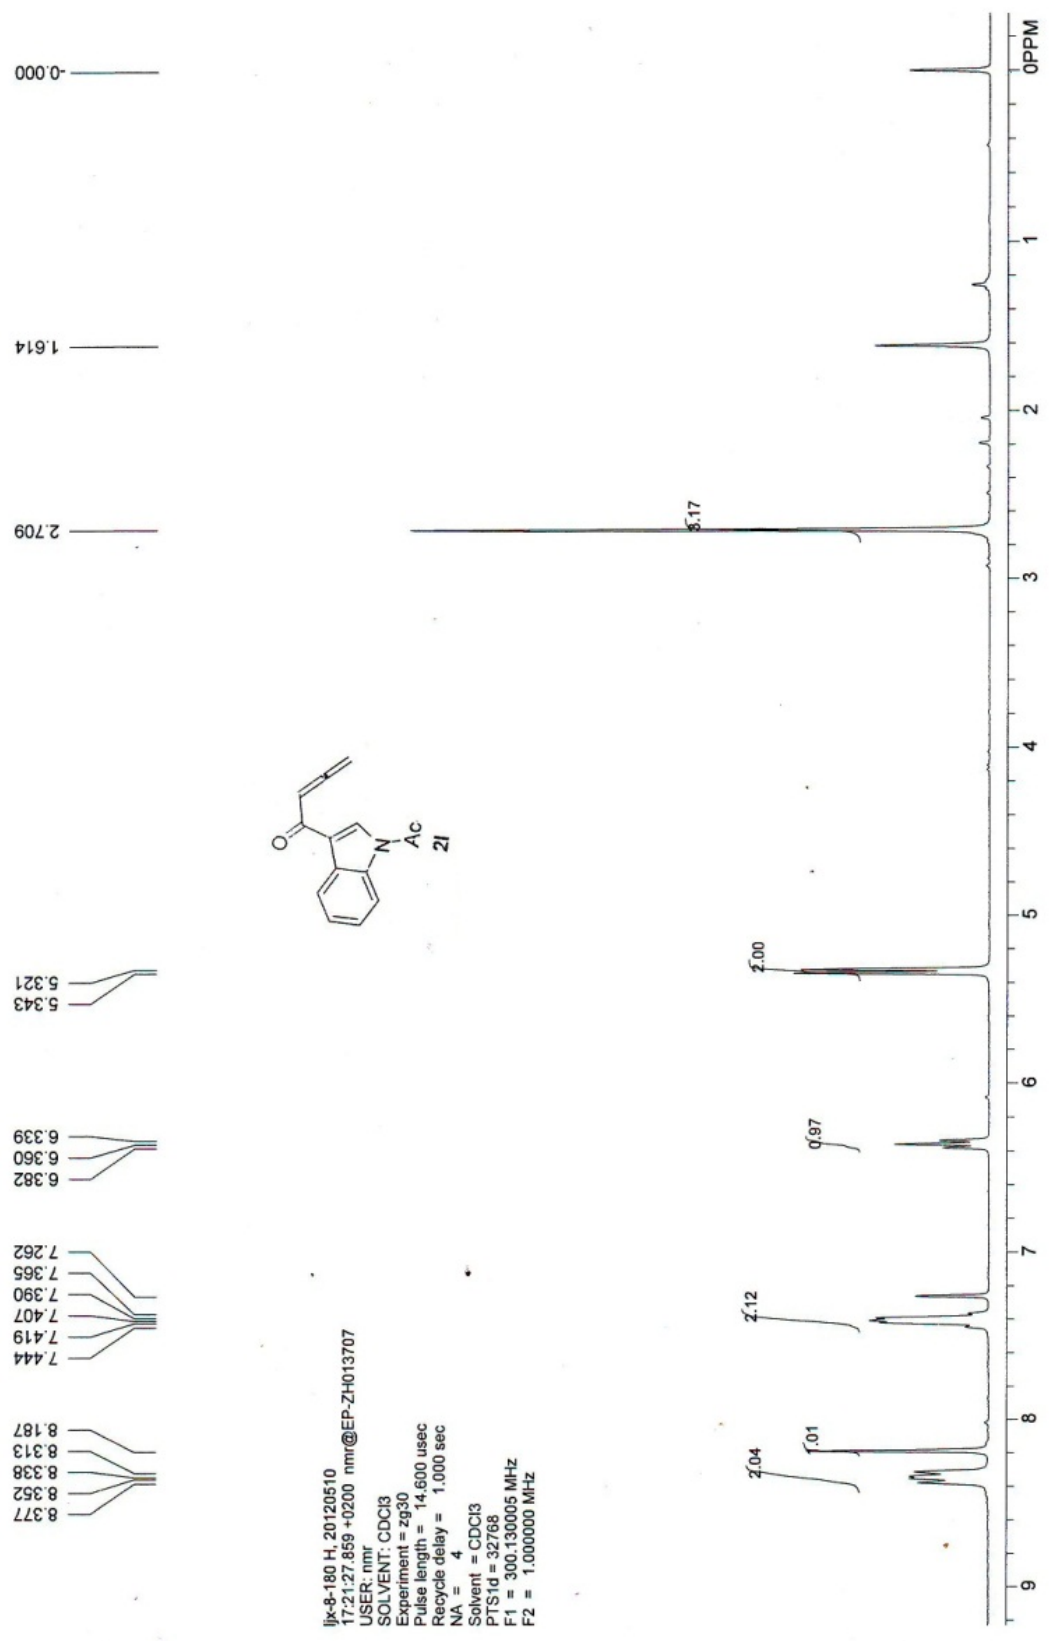

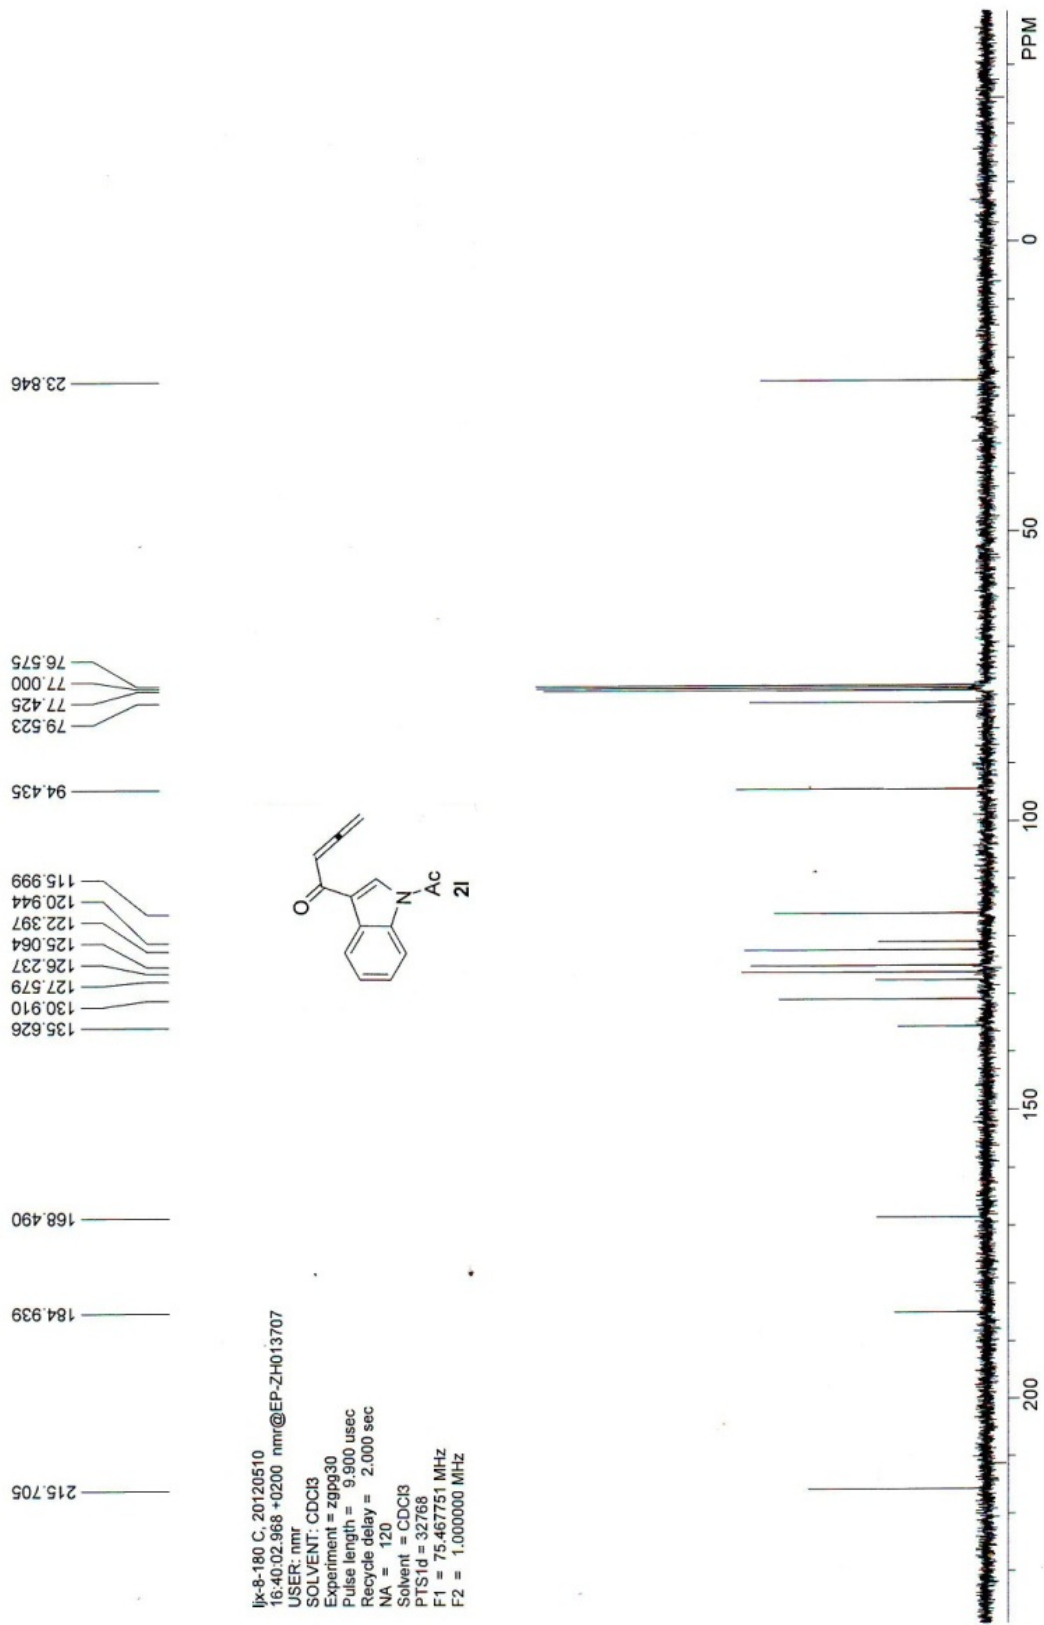

Supplement: c3ob40226f.pdf [file c3ob40226f.pdf]
